# Supplementary material for: Tonality Tunes the Statistical Characteristics in Music: Computational Approaches on Statistical Learning
Source: Front Comput Neurosci. 2019 Oct 2;13:70. doi: 10.3389/fncom.2019.00070 (PMC6783562; doi:10.3389/fncom.2019.00070)
Supplement: Supplementary Table 1 — The results of correlation analysis. The red, green, yellow cells represent strong (0.7 ≦ |r| < 1.0), moderate (0.4 ≦ |r| < 0.7), and weak (0.2 ≦ |r| < 0.4) correlations, respectively. M and m indicate major and minor keys, respectively. [file Table_1.XLSX]

## Sheet: 1st-order
		No1																								No2
		CM	Cm	DbM	Dbm	DM	Dm	E♭M	E♭m	EM	Em	FM	Fm	F#M	F#m	GM	Gm	A♭M	G#m	AM	Am	B♭M	B♭m	BM	Bm	CM	Cm	DbM	Dbm	DM	Dm	E♭M	E♭m	EM	Em	FM	Fm	F#M	F#m	GM	Gm	A♭M	G#m	AM	Am	B♭M	B♭m	BM	Bm
No1	CM	1	.8**	.7**	.6**	.7**	.6**	.7**	.8**	.7**	.8**	.8**	.8**	.8**	.8**	.8**	.8**	.8**	.7**	.7**	.8**	.7**	.6**	.7**	.7**	.8**	.8**	.9**	.7**	.7**	.8**	.8**	.8**	.8**	.7**	.8**	.8**	.8**	.8**	.8**	.7**	.8**	.8**	.8**	.7**	.8**	.8**	.8**	.8**
	Cm	.8**	1	.8**	.8**	.8**	.8**	.8**	.9**	.8**	.9**	.9**	.9**	.9**	.8**	.9**	.9**	.9**	.8**	.8**	.9**	.8**	.7**	.8**	.8**	.9**	.9**	.8**	.8**	.8**	.9**	.8**	.9**	.9**	.9**	.9**	.9**	.9**	.9**	.9**	.9**	.9**	.8**	.8**	.8**	.8**	.8**	.9**	.8**
	DbM	.7**	.8**	1	.8**	.8**	.8**	.9**	.9**	.8**	.9**	.9**	.8**	.9**	.9**	.9**	.8**	.9**	.8**	.8**	.9**	.9**	.7**	.8**	.8**	.9**	.9**	.8**	.9**	.8**	.9**	.8**	.9**	.9**	.8**	.8**	.9**	.9**	.9**	.9**	.8**	.9**	.9**	.8**	.7**	.9**	.8**	.9**	.9**
	Dbm	.6**	.8**	.8**	1	.7**	.8**	.8**	.8**	.8**	.8**	.8**	.7**	.8**	.8**	.8**	.8**	.8**	.7**	.8**	.8**	.7**	.8**	.8**	.8**	.8**	.8**	.8**	.8**	.8**	.8**	.8**	.7**	.9**	.8**	.8**	.8**	.8**	.8**	.8**	.8**	.8**	.7**	.7**	.8**	.8**	.8**	.8**	.8**
	DM	.7**	.8**	.8**	.7**	1	.7**	.8**	.8**	.8**	.8**	.8**	.8**	.8**	.9**	.8**	.8**	.8**	.8**	.8**	.8**	.8**	.7**	.7**	.8**	.9**	.8**	.7**	.7**	.7**	.8**	.8**	.8**	.8**	.8**	.8**	.8**	.8**	.8**	.8**	.8**	.8**	.8**	.7**	.7**	.8**	.7**	.8**	.8**
	Dm	.6**	.8**	.8**	.8**	.7**	1	.8**	.8**	.8**	.8**	.8**	.8**	.8**	.8**	.8**	.8**	.8**	.8**	.8**	.9**	.8**	.8**	.8**	.8**	.8**	.8**	.7**	.8**	.8**	.9**	.8**	.8**	.8**	.8**	.8**	.8**	.9**	.9**	.8**	.8**	.8**	.8**	.7**	.8**	.8**	.8**	.9**	.8**
	E♭M	.7**	.8**	.9**	.8**	.8**	.8**	1	.9**	.9**	.9**	.8**	.8**	.9**	.9**	.9**	.8**	.9**	.7**	.9**	.9**	.8**	.8**	.8**	.9**	.9**	.9**	.8**	.8**	.8**	.9**	.8**	.9**	.8**	.9**	.8**	.9**	.9**	.8**	.8**	.9**	.9**	.8**	.8**	.8**	.8**	.8**	.9**	.8**
	E♭m	.8**	.9**	.9**	.8**	.8**	.8**	.9**	1	.8**	.9**	.9**	.8**	.9**	.9**	.9**	.8**	.9**	.8**	.9**	.9**	.8**	.8**	.8**	.8**	.9**	.9**	.8**	.8**	.9**	.9**	.9**	.9**	.9**	.9**	.9**	.9**	.9**	.9**	.9**	.9**	.9**	.8**	.8**	.8**	.9**	.8**	.9**	.9**
	EM	.7**	.8**	.8**	.8**	.8**	.8**	.9**	.8**	1	.9**	.8**	.8**	.9**	.8**	.8**	.9**	.9**	.7**	.8**	.8**	.8**	.8**	.8**	.9**	.8**	.9**	.8**	.8**	.8**	.8**	.8**	.8**	.8**	.8**	.8**	.8**	.8**	.8**	.8**	.8**	.8**	.8**	.8**	.7**	.8**	.8**	.8**	.8**
	Em	.8**	.9**	.9**	.8**	.8**	.8**	.9**	.9**	.9**	1	.9**	.9**	.9**	.9**	.9**	.9**	.9**	.8**	.9**	.9**	.8**	.7**	.8**	.9**	.9**	.9**	.9**	.9**	.8**	.9**	.9**	.9**	.9**	.9**	.9**	.9**	.9**	.9**	.9**	.9**	.9**	.9**	.8**	.8**	.9**	.9**	.9**	.9**
	FM	.8**	.9**	.9**	.8**	.8**	.8**	.8**	.9**	.8**	.9**	1	.9**	.9**	.9**	.9**	.9**	.9**	.8**	.8**	.9**	.9**	.7**	.8**	.9**	.9**	.9**	.9**	.8**	.8**	.9**	.9**	.9**	.9**	.9**	.9**	.9**	.9**	.9**	.9**	.9**	.9**	.9**	.8**	.8**	.9**	.8**	.9**	.9**
	Fm	.8**	.9**	.8**	.7**	.8**	.8**	.8**	.8**	.8**	.9**	.9**	1	.9**	.9**	.9**	.8**	.8**	.9**	.8**	.9**	.9**	.8**	.8**	.8**	.9**	.9**	.8**	.8**	.8**	.8**	.8**	.8**	.9**	.8**	.9**	.9**	.9**	.9**	.8**	.9**	.9**	.9**	.8**	.7**	.8**	.8**	.9**	.9**
	F#M	.8**	.9**	.9**	.8**	.8**	.8**	.9**	.9**	.9**	.9**	.9**	.9**	1	.9**	.9**	.9**	.9**	.9**	.8**	.9**	.9**	.8**	.8**	.9**	.9**	.9**	.8**	.9**	.8**	.9**	.9**	.9**	.9**	.9**	.9**	.9**	.9**	.9**	.9**	.9**	.9**	.9**	.8**	.8**	.9**	.9**	.9**	.9**
	F#m	.8**	.8**	.9**	.8**	.9**	.8**	.9**	.9**	.8**	.9**	.9**	.9**	.9**	1	.9**	.8**	.9**	.8**	.8**	.9**	.9**	.7**	.8**	.9**	.9**	.9**	.8**	.8**	.8**	.9**	.9**	.9**	.9**	.9**	.9**	.9**	.9**	.9**	.9**	.9**	.9**	.9**	.8**	.8**	.9**	.8**	.9**	.9**
	GM	.8**	.9**	.9**	.8**	.8**	.8**	.9**	.9**	.8**	.9**	.9**	.9**	.9**	.9**	1	.8**	.9**	.8**	.8**	.9**	.9**	.7**	.8**	.9**	.9**	.9**	.8**	.9**	.8**	.9**	.9**	.9**	.9**	.9**	.9**	.9**	.9**	.9**	.9**	.9**	.9**	.9**	.8**	.8**	.9**	.8**	.9**	.9**
	Gm	.8**	.9**	.8**	.8**	.8**	.8**	.8**	.8**	.9**	.9**	.9**	.8**	.9**	.8**	.8**	1	.9**	.8**	.8**	.8**	.8**	.8**	.8**	.9**	.9**	.9**	.9**	.8**	.8**	.9**	.8**	.8**	.9**	.8**	.8**	.8**	.8**	.9**	.9**	.8**	.8**	.8**	.8**	.8**	.8**	.9**	.8**	.8**
	A♭M	.8**	.9**	.9**	.8**	.8**	.8**	.9**	.9**	.9**	.9**	.9**	.8**	.9**	.9**	.9**	.9**	1	.8**	.9**	.9**	.8**	.7**	.8**	.9**	.9**	.9**	.9**	.9**	.8**	.9**	.9**	.9**	.9**	.9**	.9**	.9**	.9**	.9**	.9**	.9**	.9**	.9**	.8**	.8**	.9**	.9**	.9**	.9**
	G#m	.7**	.8**	.8**	.7**	.8**	.8**	.7**	.8**	.7**	.8**	.8**	.9**	.9**	.8**	.8**	.8**	.8**	1	.8**	.8**	.8**	.7**	.8**	.8**	.9**	.8**	.8**	.8**	.8**	.8**	.8**	.8**	.9**	.8**	.9**	.9**	.8**	.8**	.8**	.8**	.8**	.8**	.7**	.8**	.8**	.8**	.8**	.8**
	AM	.7**	.8**	.8**	.8**	.8**	.8**	.9**	.9**	.8**	.9**	.8**	.8**	.8**	.8**	.8**	.8**	.9**	.8**	1	.8**	.8**	.8**	.8**	.8**	.9**	.8**	.8**	.8**	.8**	.9**	.8**	.9**	.9**	.8**	.9**	.8**	.9**	.8**	.8**	.9**	.8**	.8**	.8**	.8**	.8**	.8**	.8**	.8**
	Am	.8**	.9**	.9**	.8**	.8**	.9**	.9**	.9**	.8**	.9**	.9**	.9**	.9**	.9**	.9**	.8**	.9**	.8**	.8**	1	.9**	.8**	.8**	.9**	.9**	.9**	.8**	.9**	.8**	.9**	.8**	.9**	.9**	.9**	.9**	.9**	.9**	.9**	.9**	.9**	.9**	.9**	.8**	.8**	.9**	.9**	.9**	.9**
	B♭M	.7**	.8**	.9**	.7**	.8**	.8**	.8**	.8**	.8**	.8**	.9**	.9**	.9**	.9**	.9**	.8**	.8**	.8**	.8**	.9**	1	.7**	.7**	.8**	.9**	.9**	.8**	.8**	.7**	.8**	.8**	.8**	.8**	.8**	.8**	.9**	.9**	.8**	.8**	.8**	.8**	.9**	.8**	.7**	.8**	.8**	.9**	.8**
	B♭m	.6**	.7**	.7**	.8**	.7**	.8**	.8**	.8**	.8**	.7**	.7**	.8**	.8**	.7**	.7**	.8**	.7**	.7**	.8**	.8**	.7**	1	.8**	.8**	.8**	.8**	.7**	.8**	.8**	.8**	.7**	.7**	.8**	.8**	.8**	.7**	.8**	.8**	.7**	.8**	.7**	.7**	.7**	.7**	.7**	.8**	.8**	.7**
	BM	.7**	.8**	.8**	.8**	.7**	.8**	.8**	.8**	.8**	.8**	.8**	.8**	.8**	.8**	.8**	.8**	.8**	.8**	.8**	.8**	.7**	.8**	1	.8**	.8**	.8**	.8**	.8**	.8**	.8**	.8**	.8**	.8**	.8**	.9**	.8**	.8**	.8**	.8**	.8**	.8**	.7**	.8**	.7**	.8**	.8**	.8**	.7**
	Bm	.7**	.8**	.8**	.8**	.8**	.8**	.9**	.8**	.9**	.9**	.9**	.8**	.9**	.9**	.9**	.9**	.9**	.8**	.8**	.9**	.8**	.8**	.8**	1	.9**	.9**	.8**	.9**	.8**	.9**	.8**	.9**	.8**	.9**	.8**	.9**	.9**	.9**	.9**	.8**	.9**	.9**	.8**	.8**	.8**	.8**	.9**	.8**
No2	CM	.8**	.9**	.9**	.8**	.9**	.8**	.9**	.9**	.8**	.9**	.9**	.9**	.9**	.9**	.9**	.9**	.9**	.9**	.9**	.9**	.9**	.8**	.8**	.9**	1	.9**	.8**	.8**	.8**	.9**	.9**	.9**	.9**	.8**	.9**	.9**	.9**	.9**	.9**	.9**	.9**	.9**	.8**	.8**	.9**	.9**	.9**	.9**
	Cm	.8**	.9**	.9**	.8**	.8**	.8**	.9**	.9**	.9**	.9**	.9**	.9**	.9**	.9**	.9**	.9**	.9**	.8**	.8**	.9**	.9**	.8**	.8**	.9**	.9**	1	.8**	.8**	.8**	.9**	.8**	.9**	.8**	.9**	.9**	.9**	.9**	.9**	.9**	.8**	.9**	.9**	.8**	.8**	.9**	.8**	.9**	.9**
	DbM	.9**	.8**	.8**	.8**	.7**	.7**	.8**	.8**	.8**	.9**	.9**	.8**	.8**	.8**	.8**	.9**	.9**	.8**	.8**	.8**	.8**	.7**	.8**	.8**	.8**	.8**	1	.8**	.8**	.8**	.8**	.8**	.8**	.8**	.8**	.8**	.8**	.9**	.8**	.8**	.8**	.8**	.8**	.7**	.8**	.8**	.8**	.8**
	Dbm	.7**	.8**	.9**	.8**	.7**	.8**	.8**	.8**	.8**	.9**	.8**	.8**	.9**	.8**	.9**	.8**	.9**	.8**	.8**	.9**	.8**	.8**	.8**	.9**	.8**	.8**	.8**	1	.8**	.9**	.8**	.8**	.9**	.8**	.8**	.9**	.9**	.9**	.8**	.8**	.8**	.8**	.8**	.8**	.8**	.8**	.8**	.8**
	DM	.7**	.8**	.8**	.8**	.7**	.8**	.8**	.9**	.8**	.8**	.8**	.8**	.8**	.8**	.8**	.8**	.8**	.8**	.8**	.8**	.7**	.8**	.8**	.8**	.8**	.8**	.8**	.8**	1	.8**	.8**	.8**	.9**	.8**	.8**	.8**	.8**	.8**	.8**	.8**	.8**	.8**	.7**	.8**	.8**	.8**	.8**	.8**
	Dm	.8**	.9**	.9**	.8**	.8**	.9**	.9**	.9**	.8**	.9**	.9**	.8**	.9**	.9**	.9**	.9**	.9**	.8**	.9**	.9**	.8**	.8**	.8**	.9**	.9**	.9**	.8**	.9**	.8**	1	.9**	.9**	.9**	.9**	.9**	.9**	.9**	.9**	.9**	.9**	.9**	.9**	.8**	.9**	.9**	.9**	.9**	.8**
	E♭M	.8**	.8**	.8**	.8**	.8**	.8**	.8**	.9**	.8**	.9**	.9**	.8**	.9**	.9**	.9**	.8**	.9**	.8**	.8**	.8**	.8**	.7**	.8**	.8**	.9**	.8**	.8**	.8**	.8**	.9**	1	.8**	.9**	.8**	.9**	.9**	.9**	.8**	.8**	.8**	.8**	.9**	.8**	.8**	.8**	.8**	.8**	.8**
	E♭m	.8**	.9**	.9**	.7**	.8**	.8**	.9**	.9**	.8**	.9**	.9**	.8**	.9**	.9**	.9**	.8**	.9**	.8**	.9**	.9**	.8**	.7**	.8**	.9**	.9**	.9**	.8**	.8**	.8**	.9**	.8**	1	.9**	.9**	.8**	.9**	.9**	.9**	.9**	.8**	.9**	.9**	.8**	.8**	.8**	.8**	.9**	.9**
	EM	.8**	.9**	.9**	.9**	.8**	.8**	.8**	.9**	.8**	.9**	.9**	.9**	.9**	.9**	.9**	.9**	.9**	.9**	.9**	.9**	.8**	.8**	.8**	.8**	.9**	.8**	.8**	.9**	.9**	.9**	.9**	.9**	1	.9**	.9**	.9**	.9**	.9**	.8**	.9**	.9**	.8**	.8**	.8**	.9**	.9**	.9**	.9**
	Em	.7**	.9**	.8**	.8**	.8**	.8**	.9**	.9**	.8**	.9**	.9**	.8**	.9**	.9**	.9**	.8**	.9**	.8**	.8**	.9**	.8**	.8**	.8**	.9**	.8**	.9**	.8**	.8**	.8**	.9**	.8**	.9**	.9**	1	.8**	.8**	.9**	.9**	.9**	.8**	.9**	.8**	.8**	.8**	.8**	.8**	.8**	.8**
	FM	.8**	.9**	.8**	.8**	.8**	.8**	.8**	.9**	.8**	.9**	.9**	.9**	.9**	.9**	.9**	.8**	.9**	.9**	.9**	.9**	.8**	.8**	.9**	.8**	.9**	.9**	.8**	.8**	.8**	.9**	.9**	.8**	.9**	.8**	1	.9**	.9**	.9**	.9**	.9**	.9**	.8**	.8**	.8**	.8**	.9**	.9**	.8**
	Fm	.8**	.9**	.9**	.8**	.8**	.8**	.9**	.9**	.8**	.9**	.9**	.9**	.9**	.9**	.9**	.8**	.9**	.9**	.8**	.9**	.9**	.7**	.8**	.9**	.9**	.9**	.8**	.9**	.8**	.9**	.9**	.9**	.9**	.8**	.9**	1	.9**	.9**	.9**	.9**	.9**	.9**	.8**	.8**	.9**	.9**	.9**	.9**
	F#M	.8**	.9**	.9**	.8**	.8**	.9**	.9**	.9**	.8**	.9**	.9**	.9**	.9**	.9**	.9**	.8**	.9**	.8**	.9**	.9**	.9**	.8**	.8**	.9**	.9**	.9**	.8**	.9**	.8**	.9**	.9**	.9**	.9**	.9**	.9**	.9**	1	.9**	.9**	.9**	.9**	.9**	.8**	.8**	.9**	.9**	.9**	.9**
	F#m	.8**	.9**	.9**	.8**	.8**	.9**	.8**	.9**	.8**	.9**	.9**	.9**	.9**	.9**	.9**	.9**	.9**	.8**	.8**	.9**	.8**	.8**	.8**	.9**	.9**	.9**	.9**	.9**	.8**	.9**	.8**	.9**	.9**	.9**	.9**	.9**	.9**	1	.9**	.9**	.9**	.9**	.8**	.8**	.9**	.9**	.9**	.9**
	GM	.8**	.9**	.9**	.8**	.8**	.8**	.8**	.9**	.8**	.9**	.9**	.8**	.9**	.9**	.9**	.9**	.9**	.8**	.8**	.9**	.8**	.7**	.8**	.9**	.9**	.9**	.8**	.8**	.8**	.9**	.8**	.9**	.8**	.9**	.9**	.9**	.9**	.9**	1	.9**	.9**	.9**	.8**	.8**	.9**	.9**	.9**	.9**
	Gm	.7**	.9**	.8**	.8**	.8**	.8**	.9**	.9**	.8**	.9**	.9**	.9**	.9**	.9**	.9**	.8**	.9**	.8**	.9**	.9**	.8**	.8**	.8**	.8**	.9**	.8**	.8**	.8**	.8**	.9**	.8**	.8**	.9**	.8**	.9**	.9**	.9**	.9**	.9**	1	.9**	.9**	.8**	.8**	.8**	.9**	.9**	.8**
	A♭M	.8**	.9**	.9**	.8**	.8**	.8**	.9**	.9**	.8**	.9**	.9**	.9**	.9**	.9**	.9**	.8**	.9**	.8**	.8**	.9**	.8**	.7**	.8**	.9**	.9**	.9**	.8**	.8**	.8**	.9**	.8**	.9**	.9**	.9**	.9**	.9**	.9**	.9**	.9**	.9**	1	.9**	.8**	.8**	.9**	.8**	.9**	.9**
	G#m	.8**	.8**	.9**	.7**	.8**	.8**	.8**	.8**	.8**	.9**	.9**	.9**	.9**	.9**	.9**	.8**	.9**	.8**	.8**	.9**	.9**	.7**	.7**	.9**	.9**	.9**	.8**	.8**	.8**	.9**	.9**	.9**	.8**	.8**	.8**	.9**	.9**	.9**	.9**	.9**	.9**	1	.8**	.8**	.9**	.9**	.9**	.9**
	AM	.8**	.8**	.8**	.7**	.7**	.7**	.8**	.8**	.8**	.8**	.8**	.8**	.8**	.8**	.8**	.8**	.8**	.7**	.8**	.8**	.8**	.7**	.8**	.8**	.8**	.8**	.8**	.8**	.7**	.8**	.8**	.8**	.8**	.8**	.8**	.8**	.8**	.8**	.8**	.8**	.8**	.8**	1	.7**	.8**	.8**	.8**	.8**
	Am	.7**	.8**	.7**	.8**	.7**	.8**	.8**	.8**	.7**	.8**	.8**	.7**	.8**	.8**	.8**	.8**	.8**	.8**	.8**	.8**	.7**	.7**	.7**	.8**	.8**	.8**	.7**	.8**	.8**	.9**	.8**	.8**	.8**	.8**	.8**	.8**	.8**	.8**	.8**	.8**	.8**	.8**	.7**	1	.8**	.9**	.8**	.8**
	B♭M	.8**	.8**	.9**	.8**	.8**	.8**	.8**	.9**	.8**	.9**	.9**	.8**	.9**	.9**	.9**	.8**	.9**	.8**	.8**	.9**	.8**	.7**	.8**	.8**	.9**	.9**	.8**	.8**	.8**	.9**	.8**	.8**	.9**	.8**	.8**	.9**	.9**	.9**	.9**	.8**	.9**	.9**	.8**	.8**	1	.8**	.9**	.9**
	B♭m	.8**	.8**	.8**	.8**	.7**	.8**	.8**	.8**	.8**	.9**	.8**	.8**	.9**	.8**	.8**	.9**	.9**	.8**	.8**	.9**	.8**	.8**	.8**	.8**	.9**	.8**	.8**	.8**	.8**	.9**	.8**	.8**	.9**	.8**	.9**	.9**	.9**	.9**	.9**	.9**	.8**	.9**	.8**	.9**	.8**	1	.9**	.8**
	BM	.8**	.9**	.9**	.8**	.8**	.9**	.9**	.9**	.8**	.9**	.9**	.9**	.9**	.9**	.9**	.8**	.9**	.8**	.8**	.9**	.9**	.8**	.8**	.9**	.9**	.9**	.8**	.8**	.8**	.9**	.8**	.9**	.9**	.8**	.9**	.9**	.9**	.9**	.9**	.9**	.9**	.9**	.8**	.8**	.9**	.9**	1	.9**
	Bm	.8**	.8**	.9**	.8**	.8**	.8**	.8**	.9**	.8**	.9**	.9**	.9**	.9**	.9**	.9**	.8**	.9**	.8**	.8**	.9**	.8**	.7**	.7**	.8**	.9**	.9**	.8**	.8**	.8**	.8**	.8**	.9**	.9**	.8**	.8**	.9**	.9**	.9**	.9**	.8**	.9**	.9**	.8**	.8**	.9**	.8**	.9**	1
* = p <0.05, ** = p < 0.01

## Sheet: 2nd-order
		No1																								No2
		CM	Cm	DbM	Dbm	DM	Dm	E♭M	E♭m	EM	Em	FM	Fm	F#M	F#m	GM	Gm	A♭M	G#m	AM	Am	B♭M	B♭m	BM	Bm	CM	Cm	DbM	Dbm	DM	Dm	E♭M	E♭m	EM	Em	FM	Fm	F#M	F#m	GM	Gm	A♭M	G#m	AM	Am	B♭M	B♭m	BM	Bm
No1	CM	1	.2**	.2**	.3**	.2**	.2**	.2**	.3**	.4**	.4**	.4**	.3**	.3**	.3**	.3**	.3**	.4**	.3**	.3**	.3**	.2**	.3**	.3**	.2**	.4**	.3**	.5**	.3**	.4**	.3**	.4**	.3**	.3**	.3**	.3**	.2**	.3**	.4**	.3**	.4**	.3**	.2**	.3**	.2**	.3**	.3**	.3**	.3**
	Cm	.2**	1	.3**	.4**	.4**	.3**	.4**	.4**	.4**	.4**	.4**	.4**	.4**	.4**	.4**	.4**	.4**	.4**	.4**	.4**	.3**	.3**	.4**	.4**	.4**	.4**	.3**	.4**	.3**	.4**	.4**	.4**	.4**	.4**	.4**	.3**	.4**	.5**	.4**	.4**	.5**	.4**	.4**	.4**	.4**	.5**	.5**	.3**
	DbM	.2**	.3**	1	.3**	.3**	.3**	.3**	.3**	.3**	.3**	.4**	.3**	.4**	.3**	.4**	.3**	.5**	.3**	.3**	.3**	.4**	.2**	.3**	.2**	.4**	.3**	.3**	.4**	.4**	.4**	.3**	.3**	.3**	.3**	.3**	.4**	.4**	.4**	.4**	.3**	.4**	.3**	.2**	.2**	.3**	.3**	.4**	.3**
	Dbm	.3**	.4**	.3**	1	.4**	.3**	.4**	.4**	.4**	.3**	.4**	.4**	.4**	.4**	.3**	.4**	.4**	.4**	.4**	.5**	.3**	.4**	.5**	.5**	.4**	.4**	.3**	.5**	.4**	.3**	.3**	.4**	.4**	.4**	.5**	.3**	.4**	.5**	.3**	.4**	.4**	.4**	.5**	.4**	.4**	.5**	.4**	.3**
	DM	.2**	.4**	.3**	.4**	1	.3**	.4**	.4**	.4**	.3**	.3**	.4**	.4**	.4**	.3**	.3**	.4**	.4**	.4**	.4**	.3**	.4**	.4**	.4**	.4**	.3**	.3**	.4**	.4**	.3**	.3**	.3**	.4**	.3**	.4**	.3**	.4**	.4**	.2**	.3**	.3**	.3**	.3**	.3**	.3**	.4**	.4**	.3**
	Dm	.2**	.3**	.3**	.3**	.3**	1	.4**	.3**	.3**	.3**	.4**	.3**	.3**	.3**	.3**	.3**	.3**	.3**	.3**	.4**	.3**	.3**	.3**	.2**	.4**	.3**	.3**	.3**	.3**	.4**	.3**	.3**	.3**	.2**	.3**	.3**	.4**	.3**	.3**	.3**	.3**	.2**	.2**	.3**	.3**	.3**	.4**	.2**
	E♭M	.2**	.4**	.3**	.4**	.4**	.4**	1	.4**	.4**	.4**	.4**	.4**	.4**	.4**	.4**	.4**	.4**	.4**	.5**	.4**	.3**	.4**	.5**	.4**	.4**	.4**	.3**	.4**	.4**	.4**	.4**	.4**	.4**	.4**	.4**	.4**	.4**	.4**	.3**	.4**	.5**	.4**	.4**	.4**	.4**	.5**	.5**	.3**
	E♭m	.3**	.4**	.3**	.4**	.4**	.3**	.4**	1	.4**	.4**	.4**	.5**	.4**	.4**	.3**	.4**	.4**	.5**	.5**	.5**	.3**	.4**	.5**	.4**	.4**	.4**	.4**	.5**	.4**	.4**	.4**	.4**	.4**	.5**	.5**	.4**	.4**	.5**	.2**	.5**	.5**	.4**	.5**	.4**	.5**	.5**	.4**	.4**
	EM	.4**	.4**	.3**	.4**	.4**	.3**	.4**	.4**	1	.4**	.5**	.4**	.4**	.4**	.4**	.4**	.4**	.3**	.5**	.5**	.3**	.4**	.4**	.4**	.4**	.5**	.5**	.5**	.4**	.4**	.5**	.4**	.4**	.4**	.4**	.3**	.4**	.5**	.3**	.4**	.5**	.4**	.4**	.3**	.5**	.4**	.4**	.3**
	Em	.4**	.4**	.3**	.3**	.3**	.3**	.4**	.4**	.4**	1	.4**	.4**	.4**	.4**	.4**	.4**	.4**	.4**	.4**	.4**	.3**	.3**	.4**	.4**	.4**	.4**	.4**	.5**	.5**	.5**	.4**	.4**	.4**	.4**	.4**	.4**	.4**	.5**	.4**	.4**	.5**	.4**	.4**	.4**	.4**	.5**	.5**	.4**
	FM	.4**	.4**	.4**	.4**	.3**	.4**	.4**	.4**	.5**	.4**	1	.4**	.4**	.4**	.4**	.4**	.4**	.4**	.4**	.5**	.4**	.3**	.4**	.4**	.4**	.4**	.4**	.5**	.4**	.5**	.5**	.4**	.4**	.4**	.4**	.3**	.5**	.5**	.4**	.4**	.5**	.3**	.4**	.3**	.4**	.4**	.4**	.4**
	Fm	.3**	.4**	.3**	.4**	.4**	.3**	.4**	.5**	.4**	.4**	.4**	1	.4**	.5**	.4**	.4**	.4**	.5**	.4**	.5**	.3**	.4**	.5**	.4**	.5**	.4**	.4**	.5**	.4**	.4**	.4**	.4**	.4**	.4**	.5**	.4**	.4**	.5**	.3**	.4**	.5**	.4**	.4**	.4**	.4**	.4**	.5**	.4**
	F#M	.3**	.4**	.4**	.4**	.4**	.3**	.4**	.4**	.4**	.4**	.4**	.4**	1	.3**	.4**	.4**	.4**	.4**	.4**	.4**	.4**	.3**	.3**	.3**	.4**	.3**	.4**	.4**	.4**	.4**	.4**	.3**	.4**	.4**	.5**	.4**	.4**	.5**	.4**	.4**	.4**	.4**	.4**	.3**	.4**	.4**	.4**	.3**
	F#m	.3**	.4**	.3**	.4**	.4**	.3**	.4**	.4**	.4**	.4**	.4**	.5**	.3**	1	.4**	.4**	.4**	.5**	.5**	.5**	.3**	.4**	.5**	.4**	.4**	.3**	.4**	.5**	.3**	.4**	.4**	.4**	.3**	.4**	.4**	.3**	.4**	.5**	.3**	.4**	.4**	.4**	.4**	.3**	.3**	.5**	.4**	.3**
	GM	.3**	.4**	.4**	.3**	.3**	.3**	.4**	.3**	.4**	.4**	.4**	.4**	.4**	.4**	1	.4**	.5**	.3**	.4**	.5**	.4**	.3**	.4**	.3**	.4**	.4**	.3**	.4**	.4**	.5**	.4**	.4**	.4**	.4**	.4**	.4**	.5**	.4**	.5**	.4**	.4**	.4**	.4**	.3**	.3**	.4**	.5**	.3**
	Gm	.3**	.4**	.3**	.4**	.3**	.3**	.4**	.4**	.4**	.4**	.4**	.4**	.4**	.4**	.4**	1	.4**	.4**	.4**	.4**	.3**	.3**	.5**	.4**	.4**	.4**	.3**	.5**	.4**	.4**	.4**	.3**	.4**	.4**	.4**	.3**	.3**	.5**	.4**	.4**	.4**	.4**	.5**	.4**	.4**	.5**	.4**	.3**
	A♭M	.4**	.4**	.5**	.4**	.4**	.3**	.4**	.4**	.4**	.4**	.4**	.4**	.4**	.4**	.5**	.4**	1	.4**	.5**	.4**	.3**	.3**	.4**	.4**	.5**	.4**	.4**	.4**	.4**	.4**	.5**	.4**	.4**	.4**	.5**	.4**	.5**	.5**	.5**	.5**	.5**	.4**	.4**	.3**	.4**	.4**	.4**	.4**
	G#m	.3**	.4**	.3**	.4**	.4**	.3**	.4**	.5**	.3**	.4**	.4**	.5**	.4**	.5**	.3**	.4**	.4**	1	.4**	.4**	.3**	.4**	.5**	.5**	.5**	.3**	.4**	.5**	.4**	.3**	.4**	.4**	.5**	.4**	.4**	.4**	.4**	.5**	.3**	.5**	.5**	.3**	.4**	.4**	.4**	.5**	.5**	.3**
	AM	.3**	.4**	.3**	.4**	.4**	.3**	.5**	.5**	.5**	.4**	.4**	.4**	.4**	.5**	.4**	.4**	.5**	.4**	1	.5**	.3**	.4**	.5**	.4**	.5**	.4**	.4**	.5**	.4**	.4**	.4**	.4**	.4**	.4**	.5**	.4**	.5**	.5**	.3**	.5**	.5**	.4**	.4**	.4**	.5**	.5**	.4**	.3**
	Am	.3**	.4**	.3**	.5**	.4**	.4**	.4**	.5**	.5**	.4**	.5**	.5**	.4**	.5**	.5**	.4**	.4**	.4**	.5**	1	.4**	.4**	.5**	.4**	.4**	.4**	.4**	.5**	.4**	.5**	.4**	.4**	.4**	.4**	.4**	.4**	.5**	.5**	.4**	.5**	.5**	.5**	.4**	.4**	.4**	.5**	.5**	.3**
	B♭M	.2**	.3**	.4**	.3**	.3**	.3**	.3**	.3**	.3**	.3**	.4**	.3**	.4**	.3**	.4**	.3**	.3**	.3**	.3**	.4**	1	.3**	.3**	.2**	.3**	.2**	.3**	.3**	.4**	.3**	.3**	.2**	.3**	.2**	.3**	.3**	.4**	.3**	.3**	.3**	.3**	.2**	.3**	.2**	.3**	.3**	.3**	.3**
	B♭m	.3**	.3**	.2**	.4**	.4**	.3**	.4**	.4**	.4**	.3**	.3**	.4**	.3**	.4**	.3**	.3**	.3**	.4**	.4**	.4**	.3**	1	.5**	.4**	.4**	.3**	.3**	.4**	.4**	.3**	.3**	.3**	.4**	.3**	.4**	.3**	.3**	.4**	.3**	.4**	.4**	.4**	.4**	.3**	.3**	.4**	.3**	.2**
	BM	.3**	.4**	.3**	.5**	.4**	.3**	.5**	.5**	.4**	.4**	.4**	.5**	.3**	.5**	.4**	.5**	.4**	.5**	.5**	.5**	.3**	.5**	1	.5**	.5**	.3**	.4**	.6**	.4**	.4**	.4**	.4**	.4**	.4**	.5**	.3**	.4**	.5**	.3**	.5**	.4**	.4**	.5**	.4**	.4**	.5**	.4**	.4**
	Bm	.2**	.4**	.2**	.5**	.4**	.2**	.4**	.4**	.4**	.4**	.4**	.4**	.3**	.4**	.3**	.4**	.4**	.5**	.4**	.4**	.2**	.4**	.5**	1	.4**	.4**	.3**	.5**	.3**	.4**	.4**	.4**	.4**	.5**	.5**	.3**	.4**	.5**	.2**	.4**	.5**	.4**	.5**	.5**	.4**	.5**	.4**	.3**
No2	CM	.4**	.4**	.4**	.4**	.4**	.4**	.4**	.4**	.4**	.4**	.4**	.5**	.4**	.4**	.4**	.4**	.5**	.5**	.5**	.4**	.3**	.4**	.5**	.4**	1	.4**	.4**	.5**	.4**	.4**	.5**	.5**	.5**	.4**	.5**	.5**	.5**	.5**	.4**	.6**	.5**	.5**	.4**	.4**	.4**	.5**	.4**	.4**
	Cm	.3**	.4**	.3**	.4**	.3**	.3**	.4**	.4**	.5**	.4**	.4**	.4**	.3**	.3**	.4**	.4**	.4**	.3**	.4**	.4**	.2**	.3**	.3**	.4**	.4**	1	.3**	.4**	.4**	.4**	.4**	.5**	.4**	.4**	.4**	.4**	.4**	.5**	.4**	.4**	.5**	.4**	.4**	.3**	.5**	.4**	.4**	.4**
	DbM	.5**	.3**	.3**	.3**	.3**	.3**	.3**	.4**	.5**	.4**	.4**	.4**	.4**	.4**	.3**	.3**	.4**	.4**	.4**	.4**	.3**	.3**	.4**	.3**	.4**	.3**	1	.4**	.4**	.3**	.4**	.3**	.4**	.3**	.5**	.3**	.4**	.4**	.4**	.4**	.4**	.3**	.4**	.3**	.4**	.4**	.4**	.3**
	Dbm	.3**	.4**	.4**	.5**	.4**	.3**	.4**	.5**	.5**	.5**	.5**	.5**	.4**	.5**	.4**	.5**	.4**	.5**	.5**	.5**	.3**	.4**	.6**	.5**	.5**	.4**	.4**	1	.4**	.5**	.4**	.4**	.5**	.5**	.5**	.4**	.5**	.6**	.3**	.5**	.5**	.4**	.5**	.4**	.4**	.5**	.4**	.4**
	DM	.4**	.3**	.4**	.4**	.4**	.3**	.4**	.4**	.4**	.5**	.4**	.4**	.4**	.3**	.4**	.4**	.4**	.4**	.4**	.4**	.4**	.4**	.4**	.3**	.4**	.4**	.4**	.4**	1	.5**	.4**	.4**	.4**	.4**	.4**	.4**	.4**	.5**	.4**	.5**	.5**	.4**	.4**	.3**	.4**	.4**	.4**	.3**
	Dm	.3**	.4**	.4**	.3**	.3**	.4**	.4**	.4**	.4**	.5**	.5**	.4**	.4**	.4**	.5**	.4**	.4**	.3**	.4**	.5**	.3**	.3**	.4**	.4**	.4**	.4**	.3**	.5**	.5**	1	.5**	.4**	.4**	.4**	.4**	.4**	.5**	.5**	.5**	.4**	.5**	.4**	.4**	.4**	.3**	.4**	.5**	.3**
	E♭M	.4**	.4**	.3**	.3**	.3**	.3**	.4**	.4**	.5**	.4**	.5**	.4**	.4**	.4**	.4**	.4**	.5**	.4**	.4**	.4**	.3**	.3**	.4**	.4**	.5**	.4**	.4**	.4**	.4**	.5**	1	.4**	.4**	.4**	.4**	.4**	.4**	.5**	.4**	.4**	.4**	.4**	.4**	.4**	.4**	.4**	.5**	.4**
	E♭m	.3**	.4**	.3**	.4**	.3**	.3**	.4**	.4**	.4**	.4**	.4**	.4**	.3**	.4**	.4**	.3**	.4**	.4**	.4**	.4**	.2**	.3**	.4**	.4**	.5**	.5**	.3**	.4**	.4**	.4**	.4**	1	.4**	.4**	.5**	.5**	.4**	.5**	.4**	.4**	.4**	.4**	.3**	.4**	.4**	.5**	.4**	.4**
	EM	.3**	.4**	.3**	.4**	.4**	.3**	.4**	.4**	.4**	.4**	.4**	.4**	.4**	.3**	.4**	.4**	.4**	.5**	.4**	.4**	.3**	.4**	.4**	.4**	.5**	.4**	.4**	.5**	.4**	.4**	.4**	.4**	1	.4**	.4**	.4**	.4**	.5**	.3**	.4**	.5**	.4**	.4**	.4**	.4**	.5**	.5**	.4**
	Em	.3**	.4**	.3**	.4**	.3**	.2**	.4**	.5**	.4**	.4**	.4**	.4**	.4**	.4**	.4**	.4**	.4**	.4**	.4**	.4**	.2**	.3**	.4**	.5**	.4**	.4**	.3**	.5**	.4**	.4**	.4**	.4**	.4**	1	.4**	.3**	.4**	.5**	.3**	.4**	.4**	.4**	.4**	.4**	.4**	.4**	.4**	.3**
	FM	.3**	.4**	.3**	.5**	.4**	.3**	.4**	.5**	.4**	.4**	.4**	.5**	.5**	.4**	.4**	.4**	.5**	.4**	.5**	.4**	.3**	.4**	.5**	.5**	.5**	.4**	.5**	.5**	.4**	.4**	.4**	.5**	.4**	.4**	1	.4**	.4**	.5**	.4**	.5**	.5**	.4**	.5**	.4**	.5**	.5**	.5**	.3**
	Fm	.2**	.3**	.4**	.3**	.3**	.3**	.4**	.4**	.3**	.4**	.3**	.4**	.4**	.3**	.4**	.3**	.4**	.4**	.4**	.4**	.3**	.3**	.3**	.3**	.5**	.4**	.3**	.4**	.4**	.4**	.4**	.5**	.4**	.3**	.4**	1	.4**	.4**	.3**	.4**	.4**	.4**	.3**	.3**	.3**	.4**	.4**	.4**
	F#M	.3**	.4**	.4**	.4**	.4**	.4**	.4**	.4**	.4**	.4**	.5**	.4**	.4**	.4**	.5**	.3**	.5**	.4**	.5**	.5**	.4**	.3**	.4**	.4**	.5**	.4**	.4**	.5**	.4**	.5**	.4**	.4**	.4**	.4**	.4**	.4**	1	.5**	.4**	.5**	.5**	.5**	.4**	.4**	.4**	.5**	.5**	.4**
	F#m	.4**	.5**	.4**	.5**	.4**	.3**	.4**	.5**	.5**	.5**	.5**	.5**	.5**	.5**	.4**	.5**	.5**	.5**	.5**	.5**	.3**	.4**	.5**	.5**	.5**	.5**	.4**	.6**	.5**	.5**	.5**	.5**	.5**	.5**	.5**	.4**	.5**	1	.5**	.5**	.6**	.5**	.5**	.4**	.5**	.6**	.5**	.5**
	GM	.3**	.4**	.4**	.3**	.2**	.3**	.3**	.2**	.3**	.4**	.4**	.3**	.4**	.3**	.5**	.4**	.5**	.3**	.3**	.4**	.3**	.3**	.3**	.2**	.4**	.4**	.4**	.3**	.4**	.5**	.4**	.4**	.3**	.3**	.4**	.3**	.4**	.5**	1	.4**	.4**	.4**	.3**	.3**	.3**	.3**	.4**	.4**
	Gm	.4**	.4**	.3**	.4**	.3**	.3**	.4**	.5**	.4**	.4**	.4**	.4**	.4**	.4**	.4**	.4**	.5**	.5**	.5**	.5**	.3**	.4**	.5**	.4**	.6**	.4**	.4**	.5**	.5**	.4**	.4**	.4**	.4**	.4**	.5**	.4**	.5**	.5**	.4**	1	.5**	.4**	.4**	.4**	.5**	.5**	.5**	.3**
	A♭M	.3**	.5**	.4**	.4**	.3**	.3**	.5**	.5**	.5**	.5**	.5**	.5**	.4**	.4**	.4**	.4**	.5**	.5**	.5**	.5**	.3**	.4**	.4**	.5**	.5**	.5**	.4**	.5**	.5**	.5**	.4**	.4**	.5**	.4**	.5**	.4**	.5**	.6**	.4**	.5**	1	.4**	.4**	.4**	.5**	.5**	.5**	.4**
	G#m	.2**	.4**	.3**	.4**	.3**	.2**	.4**	.4**	.4**	.4**	.3**	.4**	.4**	.4**	.4**	.4**	.4**	.3**	.4**	.5**	.2**	.4**	.4**	.4**	.5**	.4**	.3**	.4**	.4**	.4**	.4**	.4**	.4**	.4**	.4**	.4**	.5**	.5**	.4**	.4**	.4**	1	.4**	.4**	.3**	.5**	.4**	.4**
	AM	.3**	.4**	.2**	.5**	.3**	.2**	.4**	.5**	.4**	.4**	.4**	.4**	.4**	.4**	.4**	.5**	.4**	.4**	.4**	.4**	.3**	.4**	.5**	.5**	.4**	.4**	.4**	.5**	.4**	.4**	.4**	.3**	.4**	.4**	.5**	.3**	.4**	.5**	.3**	.4**	.4**	.4**	1	.3**	.4**	.4**	.4**	.3**
	Am	.2**	.4**	.2**	.4**	.3**	.3**	.4**	.4**	.3**	.4**	.3**	.4**	.3**	.3**	.3**	.4**	.3**	.4**	.4**	.4**	.2**	.3**	.4**	.5**	.4**	.3**	.3**	.4**	.3**	.4**	.4**	.4**	.4**	.4**	.4**	.3**	.4**	.4**	.3**	.4**	.4**	.4**	.3**	1	.3**	.5**	.4**	.3**
	B♭M	.3**	.4**	.3**	.4**	.3**	.3**	.4**	.5**	.5**	.4**	.4**	.4**	.4**	.3**	.3**	.4**	.4**	.4**	.5**	.4**	.3**	.3**	.4**	.4**	.4**	.5**	.4**	.4**	.4**	.3**	.4**	.4**	.4**	.4**	.5**	.3**	.4**	.5**	.3**	.5**	.5**	.3**	.4**	.3**	1	.5**	.5**	.4**
	B♭m	.3**	.5**	.3**	.5**	.4**	.3**	.5**	.5**	.4**	.5**	.4**	.4**	.4**	.5**	.4**	.5**	.4**	.5**	.5**	.5**	.3**	.4**	.5**	.5**	.5**	.4**	.4**	.5**	.4**	.4**	.4**	.5**	.5**	.4**	.5**	.4**	.5**	.6**	.3**	.5**	.5**	.5**	.4**	.5**	.5**	1	.5**	.4**
	BM	.3**	.5**	.4**	.4**	.4**	.4**	.5**	.4**	.4**	.5**	.4**	.5**	.4**	.4**	.5**	.4**	.4**	.5**	.4**	.5**	.3**	.3**	.4**	.4**	.4**	.4**	.4**	.4**	.4**	.5**	.5**	.4**	.5**	.4**	.5**	.4**	.5**	.5**	.4**	.5**	.5**	.4**	.4**	.4**	.5**	.5**	1	.4**
	Bm	.3**	.3**	.3**	.3**	.3**	.2**	.3**	.4**	.3**	.4**	.4**	.4**	.3**	.3**	.3**	.3**	.4**	.3**	.3**	.3**	.3**	.2**	.4**	.3**	.4**	.4**	.3**	.4**	.3**	.3**	.4**	.4**	.4**	.3**	.3**	.4**	.4**	.5**	.4**	.3**	.4**	.4**	.3**	.3**	.4**	.4**	.4**	1

## Sheet: 3rd-order
		No1																								No2
		CM	Cm	DbM	Dbm	DM	Dm	E♭M	E♭m	EM	Em	FM	Fm	F#M	F#m	GM	Gm	A♭M	G#m	AM	Am	B♭M	B♭m	BM	Bm	CM	Cm	DbM	Dbm	DM	Dm	E♭M	E♭m	EM	Em	FM	Fm	F#M	F#m	GM	Gm	A♭M	G#m	AM	Am	B♭M	B♭m	BM	Bm
No1	CM	1	.2**	.2**	.3**	.2**	.2**	.2**	.3**	.4**	.4**	.4**	.3**	.3**	.3**	.3**	.3**	.4**	.3**	.3**	.3**	.2**	.3**	.3**	.2**	.4**	.3**	.5**	.3**	.4**	.3**	.4**	.3**	.3**	.3**	.3**	.2**	.3**	.4**	.3**	.4**	.3**	.2**	.3**	.2**	.3**	.3**	.3**	.3**
	Cm	.2**	1	.3**	.4**	.4**	.3**	.4**	.4**	.4**	.4**	.4**	.4**	.4**	.4**	.4**	.4**	.4**	.4**	.4**	.4**	.3**	.3**	.4**	.4**	.4**	.4**	.3**	.4**	.3**	.4**	.4**	.4**	.4**	.4**	.4**	.3**	.4**	.5**	.4**	.4**	.5**	.4**	.4**	.4**	.4**	.5**	.5**	.3**
	DbM	.2**	.3**	1	.3**	.3**	.3**	.3**	.3**	.3**	.3**	.4**	.3**	.4**	.3**	.4**	.3**	.5**	.3**	.3**	.3**	.4**	.2**	.3**	.2**	.4**	.3**	.3**	.4**	.4**	.4**	.3**	.3**	.3**	.3**	.3**	.4**	.4**	.4**	.4**	.3**	.4**	.3**	.2**	.2**	.3**	.3**	.4**	.3**
	Dbm	.3**	.4**	.3**	1	.4**	.3**	.4**	.4**	.4**	.3**	.4**	.4**	.4**	.4**	.3**	.4**	.4**	.4**	.4**	.5**	.3**	.4**	.5**	.5**	.4**	.4**	.3**	.5**	.4**	.3**	.3**	.4**	.4**	.4**	.5**	.3**	.4**	.5**	.3**	.4**	.4**	.4**	.5**	.4**	.4**	.5**	.4**	.3**
	DM	.2**	.4**	.3**	.4**	1	.3**	.4**	.4**	.4**	.3**	.3**	.4**	.4**	.4**	.3**	.3**	.4**	.4**	.4**	.4**	.3**	.4**	.4**	.4**	.4**	.3**	.3**	.4**	.4**	.3**	.3**	.3**	.4**	.3**	.4**	.3**	.4**	.4**	.2**	.3**	.3**	.3**	.3**	.3**	.3**	.4**	.4**	.3**
	Dm	.2**	.3**	.3**	.3**	.3**	1	.4**	.3**	.3**	.3**	.4**	.3**	.3**	.3**	.3**	.3**	.3**	.3**	.3**	.4**	.3**	.3**	.3**	.2**	.4**	.3**	.3**	.3**	.3**	.4**	.3**	.3**	.3**	.2**	.3**	.3**	.4**	.3**	.3**	.3**	.3**	.2**	.2**	.3**	.3**	.3**	.4**	.2**
	E♭M	.2**	.4**	.3**	.4**	.4**	.4**	1	.4**	.4**	.4**	.4**	.4**	.4**	.4**	.4**	.4**	.4**	.4**	.5**	.4**	.3**	.4**	.5**	.4**	.4**	.4**	.3**	.4**	.4**	.4**	.4**	.4**	.4**	.4**	.4**	.4**	.4**	.4**	.3**	.4**	.5**	.4**	.4**	.4**	.4**	.5**	.5**	.3**
	E♭m	.3**	.4**	.3**	.4**	.4**	.3**	.4**	1	.4**	.4**	.4**	.5**	.4**	.4**	.3**	.4**	.4**	.5**	.5**	.5**	.3**	.4**	.5**	.4**	.4**	.4**	.4**	.5**	.4**	.4**	.4**	.4**	.4**	.5**	.5**	.4**	.4**	.5**	.2**	.5**	.5**	.4**	.5**	.4**	.5**	.5**	.4**	.4**
	EM	.4**	.4**	.3**	.4**	.4**	.3**	.4**	.4**	1	.4**	.5**	.4**	.4**	.4**	.4**	.4**	.4**	.3**	.5**	.5**	.3**	.4**	.4**	.4**	.4**	.5**	.5**	.5**	.4**	.4**	.5**	.4**	.4**	.4**	.4**	.3**	.4**	.5**	.3**	.4**	.5**	.4**	.4**	.3**	.5**	.4**	.4**	.3**
	Em	.4**	.4**	.3**	.3**	.3**	.3**	.4**	.4**	.4**	1	.4**	.4**	.4**	.4**	.4**	.4**	.4**	.4**	.4**	.4**	.3**	.3**	.4**	.4**	.4**	.4**	.4**	.5**	.5**	.5**	.4**	.4**	.4**	.4**	.4**	.4**	.4**	.5**	.4**	.4**	.5**	.4**	.4**	.4**	.4**	.5**	.5**	.4**
	FM	.4**	.4**	.4**	.4**	.3**	.4**	.4**	.4**	.5**	.4**	1	.4**	.4**	.4**	.4**	.4**	.4**	.4**	.4**	.5**	.4**	.3**	.4**	.4**	.4**	.4**	.4**	.5**	.4**	.5**	.5**	.4**	.4**	.4**	.4**	.3**	.5**	.5**	.4**	.4**	.5**	.3**	.4**	.3**	.4**	.4**	.4**	.4**
	Fm	.3**	.4**	.3**	.4**	.4**	.3**	.4**	.5**	.4**	.4**	.4**	1	.4**	.5**	.4**	.4**	.4**	.5**	.4**	.5**	.3**	.4**	.5**	.4**	.5**	.4**	.4**	.5**	.4**	.4**	.4**	.4**	.4**	.4**	.5**	.4**	.4**	.5**	.3**	.4**	.5**	.4**	.4**	.4**	.4**	.4**	.5**	.4**
	F#M	.3**	.4**	.4**	.4**	.4**	.3**	.4**	.4**	.4**	.4**	.4**	.4**	1	.3**	.4**	.4**	.4**	.4**	.4**	.4**	.4**	.3**	.3**	.3**	.4**	.3**	.4**	.4**	.4**	.4**	.4**	.3**	.4**	.4**	.5**	.4**	.4**	.5**	.4**	.4**	.4**	.4**	.4**	.3**	.4**	.4**	.4**	.3**
	F#m	.3**	.4**	.3**	.4**	.4**	.3**	.4**	.4**	.4**	.4**	.4**	.5**	.3**	1	.4**	.4**	.4**	.5**	.5**	.5**	.3**	.4**	.5**	.4**	.4**	.3**	.4**	.5**	.3**	.4**	.4**	.4**	.3**	.4**	.4**	.3**	.4**	.5**	.3**	.4**	.4**	.4**	.4**	.3**	.3**	.5**	.4**	.3**
	GM	.3**	.4**	.4**	.3**	.3**	.3**	.4**	.3**	.4**	.4**	.4**	.4**	.4**	.4**	1	.4**	.5**	.3**	.4**	.5**	.4**	.3**	.4**	.3**	.4**	.4**	.3**	.4**	.4**	.5**	.4**	.4**	.4**	.4**	.4**	.4**	.5**	.4**	.5**	.4**	.4**	.4**	.4**	.3**	.3**	.4**	.5**	.3**
	Gm	.3**	.4**	.3**	.4**	.3**	.3**	.4**	.4**	.4**	.4**	.4**	.4**	.4**	.4**	.4**	1	.4**	.4**	.4**	.4**	.3**	.3**	.5**	.4**	.4**	.4**	.3**	.5**	.4**	.4**	.4**	.3**	.4**	.4**	.4**	.3**	.3**	.5**	.4**	.4**	.4**	.4**	.5**	.4**	.4**	.5**	.4**	.3**
	A♭M	.4**	.4**	.5**	.4**	.4**	.3**	.4**	.4**	.4**	.4**	.4**	.4**	.4**	.4**	.5**	.4**	1	.4**	.5**	.4**	.3**	.3**	.4**	.4**	.5**	.4**	.4**	.4**	.4**	.4**	.5**	.4**	.4**	.4**	.5**	.4**	.5**	.5**	.5**	.5**	.5**	.4**	.4**	.3**	.4**	.4**	.4**	.4**
	G#m	.3**	.4**	.3**	.4**	.4**	.3**	.4**	.5**	.3**	.4**	.4**	.5**	.4**	.5**	.3**	.4**	.4**	1	.4**	.4**	.3**	.4**	.5**	.5**	.5**	.3**	.4**	.5**	.4**	.3**	.4**	.4**	.5**	.4**	.4**	.4**	.4**	.5**	.3**	.5**	.5**	.3**	.4**	.4**	.4**	.5**	.5**	.3**
	AM	.3**	.4**	.3**	.4**	.4**	.3**	.5**	.5**	.5**	.4**	.4**	.4**	.4**	.5**	.4**	.4**	.5**	.4**	1	.5**	.3**	.4**	.5**	.4**	.5**	.4**	.4**	.5**	.4**	.4**	.4**	.4**	.4**	.4**	.5**	.4**	.5**	.5**	.3**	.5**	.5**	.4**	.4**	.4**	.5**	.5**	.4**	.3**
	Am	.3**	.4**	.3**	.5**	.4**	.4**	.4**	.5**	.5**	.4**	.5**	.5**	.4**	.5**	.5**	.4**	.4**	.4**	.5**	1	.4**	.4**	.5**	.4**	.4**	.4**	.4**	.5**	.4**	.5**	.4**	.4**	.4**	.4**	.4**	.4**	.5**	.5**	.4**	.5**	.5**	.5**	.4**	.4**	.4**	.5**	.5**	.3**
	B♭M	.2**	.3**	.4**	.3**	.3**	.3**	.3**	.3**	.3**	.3**	.4**	.3**	.4**	.3**	.4**	.3**	.3**	.3**	.3**	.4**	1	.3**	.3**	.2**	.3**	.2**	.3**	.3**	.4**	.3**	.3**	.2**	.3**	.2**	.3**	.3**	.4**	.3**	.3**	.3**	.3**	.2**	.3**	.2**	.3**	.3**	.3**	.3**
	B♭m	.3**	.3**	.2**	.4**	.4**	.3**	.4**	.4**	.4**	.3**	.3**	.4**	.3**	.4**	.3**	.3**	.3**	.4**	.4**	.4**	.3**	1	.5**	.4**	.4**	.3**	.3**	.4**	.4**	.3**	.3**	.3**	.4**	.3**	.4**	.3**	.3**	.4**	.3**	.4**	.4**	.4**	.4**	.3**	.3**	.4**	.3**	.2**
	BM	.3**	.4**	.3**	.5**	.4**	.3**	.5**	.5**	.4**	.4**	.4**	.5**	.3**	.5**	.4**	.5**	.4**	.5**	.5**	.5**	.3**	.5**	1	.5**	.5**	.3**	.4**	.6**	.4**	.4**	.4**	.4**	.4**	.4**	.5**	.3**	.4**	.5**	.3**	.5**	.4**	.4**	.5**	.4**	.4**	.5**	.4**	.4**
	Bm	.2**	.4**	.2**	.5**	.4**	.2**	.4**	.4**	.4**	.4**	.4**	.4**	.3**	.4**	.3**	.4**	.4**	.5**	.4**	.4**	.2**	.4**	.5**	1	.4**	.4**	.3**	.5**	.3**	.4**	.4**	.4**	.4**	.5**	.5**	.3**	.4**	.5**	.2**	.4**	.5**	.4**	.5**	.5**	.4**	.5**	.4**	.3**
No2	CM	.4**	.4**	.4**	.4**	.4**	.4**	.4**	.4**	.4**	.4**	.4**	.5**	.4**	.4**	.4**	.4**	.5**	.5**	.5**	.4**	.3**	.4**	.5**	.4**	1	.4**	.4**	.5**	.4**	.4**	.5**	.5**	.5**	.4**	.5**	.5**	.5**	.5**	.4**	.6**	.5**	.5**	.4**	.4**	.4**	.5**	.4**	.4**
	Cm	.3**	.4**	.3**	.4**	.3**	.3**	.4**	.4**	.5**	.4**	.4**	.4**	.3**	.3**	.4**	.4**	.4**	.3**	.4**	.4**	.2**	.3**	.3**	.4**	.4**	1	.3**	.4**	.4**	.4**	.4**	.5**	.4**	.4**	.4**	.4**	.4**	.5**	.4**	.4**	.5**	.4**	.4**	.3**	.5**	.4**	.4**	.4**
	DbM	.5**	.3**	.3**	.3**	.3**	.3**	.3**	.4**	.5**	.4**	.4**	.4**	.4**	.4**	.3**	.3**	.4**	.4**	.4**	.4**	.3**	.3**	.4**	.3**	.4**	.3**	1	.4**	.4**	.3**	.4**	.3**	.4**	.3**	.5**	.3**	.4**	.4**	.4**	.4**	.4**	.3**	.4**	.3**	.4**	.4**	.4**	.3**
	Dbm	.3**	.4**	.4**	.5**	.4**	.3**	.4**	.5**	.5**	.5**	.5**	.5**	.4**	.5**	.4**	.5**	.4**	.5**	.5**	.5**	.3**	.4**	.6**	.5**	.5**	.4**	.4**	1	.4**	.5**	.4**	.4**	.5**	.5**	.5**	.4**	.5**	.6**	.3**	.5**	.5**	.4**	.5**	.4**	.4**	.5**	.4**	.4**
	DM	.4**	.3**	.4**	.4**	.4**	.3**	.4**	.4**	.4**	.5**	.4**	.4**	.4**	.3**	.4**	.4**	.4**	.4**	.4**	.4**	.4**	.4**	.4**	.3**	.4**	.4**	.4**	.4**	1	.5**	.4**	.4**	.4**	.4**	.4**	.4**	.4**	.5**	.4**	.5**	.5**	.4**	.4**	.3**	.4**	.4**	.4**	.3**
	Dm	.3**	.4**	.4**	.3**	.3**	.4**	.4**	.4**	.4**	.5**	.5**	.4**	.4**	.4**	.5**	.4**	.4**	.3**	.4**	.5**	.3**	.3**	.4**	.4**	.4**	.4**	.3**	.5**	.5**	1	.5**	.4**	.4**	.4**	.4**	.4**	.5**	.5**	.5**	.4**	.5**	.4**	.4**	.4**	.3**	.4**	.5**	.3**
	E♭M	.4**	.4**	.3**	.3**	.3**	.3**	.4**	.4**	.5**	.4**	.5**	.4**	.4**	.4**	.4**	.4**	.5**	.4**	.4**	.4**	.3**	.3**	.4**	.4**	.5**	.4**	.4**	.4**	.4**	.5**	1	.4**	.4**	.4**	.4**	.4**	.4**	.5**	.4**	.4**	.4**	.4**	.4**	.4**	.4**	.4**	.5**	.4**
	E♭m	.3**	.4**	.3**	.4**	.3**	.3**	.4**	.4**	.4**	.4**	.4**	.4**	.3**	.4**	.4**	.3**	.4**	.4**	.4**	.4**	.2**	.3**	.4**	.4**	.5**	.5**	.3**	.4**	.4**	.4**	.4**	1	.4**	.4**	.5**	.5**	.4**	.5**	.4**	.4**	.4**	.4**	.3**	.4**	.4**	.5**	.4**	.4**
	EM	.3**	.4**	.3**	.4**	.4**	.3**	.4**	.4**	.4**	.4**	.4**	.4**	.4**	.3**	.4**	.4**	.4**	.5**	.4**	.4**	.3**	.4**	.4**	.4**	.5**	.4**	.4**	.5**	.4**	.4**	.4**	.4**	1	.4**	.4**	.4**	.4**	.5**	.3**	.4**	.5**	.4**	.4**	.4**	.4**	.5**	.5**	.4**
	Em	.3**	.4**	.3**	.4**	.3**	.2**	.4**	.5**	.4**	.4**	.4**	.4**	.4**	.4**	.4**	.4**	.4**	.4**	.4**	.4**	.2**	.3**	.4**	.5**	.4**	.4**	.3**	.5**	.4**	.4**	.4**	.4**	.4**	1	.4**	.3**	.4**	.5**	.3**	.4**	.4**	.4**	.4**	.4**	.4**	.4**	.4**	.3**
	FM	.3**	.4**	.3**	.5**	.4**	.3**	.4**	.5**	.4**	.4**	.4**	.5**	.5**	.4**	.4**	.4**	.5**	.4**	.5**	.4**	.3**	.4**	.5**	.5**	.5**	.4**	.5**	.5**	.4**	.4**	.4**	.5**	.4**	.4**	1	.4**	.4**	.5**	.4**	.5**	.5**	.4**	.5**	.4**	.5**	.5**	.5**	.3**
	Fm	.2**	.3**	.4**	.3**	.3**	.3**	.4**	.4**	.3**	.4**	.3**	.4**	.4**	.3**	.4**	.3**	.4**	.4**	.4**	.4**	.3**	.3**	.3**	.3**	.5**	.4**	.3**	.4**	.4**	.4**	.4**	.5**	.4**	.3**	.4**	1	.4**	.4**	.3**	.4**	.4**	.4**	.3**	.3**	.3**	.4**	.4**	.4**
	F#M	.3**	.4**	.4**	.4**	.4**	.4**	.4**	.4**	.4**	.4**	.5**	.4**	.4**	.4**	.5**	.3**	.5**	.4**	.5**	.5**	.4**	.3**	.4**	.4**	.5**	.4**	.4**	.5**	.4**	.5**	.4**	.4**	.4**	.4**	.4**	.4**	1	.5**	.4**	.5**	.5**	.5**	.4**	.4**	.4**	.5**	.5**	.4**
	F#m	.4**	.5**	.4**	.5**	.4**	.3**	.4**	.5**	.5**	.5**	.5**	.5**	.5**	.5**	.4**	.5**	.5**	.5**	.5**	.5**	.3**	.4**	.5**	.5**	.5**	.5**	.4**	.6**	.5**	.5**	.5**	.5**	.5**	.5**	.5**	.4**	.5**	1	.5**	.5**	.6**	.5**	.5**	.4**	.5**	.6**	.5**	.5**
	GM	.3**	.4**	.4**	.3**	.2**	.3**	.3**	.2**	.3**	.4**	.4**	.3**	.4**	.3**	.5**	.4**	.5**	.3**	.3**	.4**	.3**	.3**	.3**	.2**	.4**	.4**	.4**	.3**	.4**	.5**	.4**	.4**	.3**	.3**	.4**	.3**	.4**	.5**	1	.4**	.4**	.4**	.3**	.3**	.3**	.3**	.4**	.4**
	Gm	.4**	.4**	.3**	.4**	.3**	.3**	.4**	.5**	.4**	.4**	.4**	.4**	.4**	.4**	.4**	.4**	.5**	.5**	.5**	.5**	.3**	.4**	.5**	.4**	.6**	.4**	.4**	.5**	.5**	.4**	.4**	.4**	.4**	.4**	.5**	.4**	.5**	.5**	.4**	1	.5**	.4**	.4**	.4**	.5**	.5**	.5**	.3**
	A♭M	.3**	.5**	.4**	.4**	.3**	.3**	.5**	.5**	.5**	.5**	.5**	.5**	.4**	.4**	.4**	.4**	.5**	.5**	.5**	.5**	.3**	.4**	.4**	.5**	.5**	.5**	.4**	.5**	.5**	.5**	.4**	.4**	.5**	.4**	.5**	.4**	.5**	.6**	.4**	.5**	1	.4**	.4**	.4**	.5**	.5**	.5**	.4**
	G#m	.2**	.4**	.3**	.4**	.3**	.2**	.4**	.4**	.4**	.4**	.3**	.4**	.4**	.4**	.4**	.4**	.4**	.3**	.4**	.5**	.2**	.4**	.4**	.4**	.5**	.4**	.3**	.4**	.4**	.4**	.4**	.4**	.4**	.4**	.4**	.4**	.5**	.5**	.4**	.4**	.4**	1	.4**	.4**	.3**	.5**	.4**	.4**
	AM	.3**	.4**	.2**	.5**	.3**	.2**	.4**	.5**	.4**	.4**	.4**	.4**	.4**	.4**	.4**	.5**	.4**	.4**	.4**	.4**	.3**	.4**	.5**	.5**	.4**	.4**	.4**	.5**	.4**	.4**	.4**	.3**	.4**	.4**	.5**	.3**	.4**	.5**	.3**	.4**	.4**	.4**	1	.3**	.4**	.4**	.4**	.3**
	Am	.2**	.4**	.2**	.4**	.3**	.3**	.4**	.4**	.3**	.4**	.3**	.4**	.3**	.3**	.3**	.4**	.3**	.4**	.4**	.4**	.2**	.3**	.4**	.5**	.4**	.3**	.3**	.4**	.3**	.4**	.4**	.4**	.4**	.4**	.4**	.3**	.4**	.4**	.3**	.4**	.4**	.4**	.3**	1	.3**	.5**	.4**	.3**
	B♭M	.3**	.4**	.3**	.4**	.3**	.3**	.4**	.5**	.5**	.4**	.4**	.4**	.4**	.3**	.3**	.4**	.4**	.4**	.5**	.4**	.3**	.3**	.4**	.4**	.4**	.5**	.4**	.4**	.4**	.3**	.4**	.4**	.4**	.4**	.5**	.3**	.4**	.5**	.3**	.5**	.5**	.3**	.4**	.3**	1	.5**	.5**	.4**
	B♭m	.3**	.5**	.3**	.5**	.4**	.3**	.5**	.5**	.4**	.5**	.4**	.4**	.4**	.5**	.4**	.5**	.4**	.5**	.5**	.5**	.3**	.4**	.5**	.5**	.5**	.4**	.4**	.5**	.4**	.4**	.4**	.5**	.5**	.4**	.5**	.4**	.5**	.6**	.3**	.5**	.5**	.5**	.4**	.5**	.5**	1	.5**	.4**
	BM	.3**	.5**	.4**	.4**	.4**	.4**	.5**	.4**	.4**	.5**	.4**	.5**	.4**	.4**	.5**	.4**	.4**	.5**	.4**	.5**	.3**	.3**	.4**	.4**	.4**	.4**	.4**	.4**	.4**	.5**	.5**	.4**	.5**	.4**	.5**	.4**	.5**	.5**	.4**	.5**	.5**	.4**	.4**	.4**	.5**	.5**	1	.4**
	Bm	.3**	.3**	.3**	.3**	.3**	.2**	.3**	.4**	.3**	.4**	.4**	.4**	.3**	.3**	.3**	.3**	.4**	.3**	.3**	.3**	.3**	.2**	.4**	.3**	.4**	.4**	.3**	.4**	.3**	.3**	.4**	.4**	.4**	.3**	.3**	.4**	.4**	.5**	.4**	.3**	.4**	.4**	.3**	.3**	.4**	.4**	.4**	1

## Sheet: 4th-order
		No1																								No2
		CM	Cm	DbM	Dbm	DM	Dm	E♭M	E♭m	EM	Em	FM	Fm	F#M	F#m	GM	Gm	A♭M	G#m	AM	Am	B♭M	B♭m	BM	Bm	CM	Cm	DbM	Dbm	DM	Dm	E♭M	E♭m	EM	Em	FM	Fm	F#M	F#m	GM	Gm	A♭M	G#m	AM	Am	B♭M	B♭m	BM	Bm
No1	CM	1	.0**	.0**	.1**	.1**	.0**	.1**	.1**	.1**	.1**	.1**	.1**	.0**	.1**	.1**	.1**	.0**	.0**	.1**	.1**	.1**	.1**	.1**	.1**	.1**	.0**	.1**	.1**	.1**	.1**	.0**	.1**	.1**	.1**	.1**	.0**	.0**	.1**	.0**	.1**	.1**	.1**	.1**	.1**	.1**	.1**	.1**	.0**
	Cm	.0**	1	.0**	.1**	.0**	.0*	.1**	.1**	.1**	.1**	.1**	.0**	0.8	.0**	.0**	.1**	.0**	.1**	.0**	.1**	.0**	.1**	.1**	.0**	.1**	.1**	.0**	.0**	.0**	.0**	.0**	.0**	.1**	.0**	.1**	.0**	.0**	.1**	.0**	.0**	.0**	.0**	.0**	.0**	.0**	.1**	.0**	.0**
	DbM	.0**	.0**	1	.1**	.1**	.0**	.0**	.1**	.1**	.1**	.1**	.1**	.0**	.1**	.1**	.1**	.1**	.1**	.1**	.1**	.0**	.1**	.1**	.0**	.0**	.0**	.1**	.0**	.1**	.1**	.0**	.0**	.1**	.1**	.1**	.0**	.0**	.1**	.0**	.0**	.1**	.0**	.1**	.0**	.0**	.1**	.1**	.0**
	Dbm	.1**	.1**	.1**	1	.1**	.0**	.1**	.1**	.1**	.1**	.1**	.1**	.0**	.1**	.1**	.1**	.0**	.1**	.1**	.1**	.1**	.2**	.2**	.1**	.1**	.1**	.1**	.2**	.1**	.1**	.0**	.2**	.1**	.1**	.1**	.1**	.0**	.1**	.0**	.1**	.1**	.1**	.1**	.1**	.1**	.1**	.1**	.1**
	DM	.1**	.0**	.1**	.1**	1	.0**	.1**	.1**	.1**	.1**	.0**	.1**	.0**	.1**	.0**	.1**	.0**	.1**	.1**	.1**	.0**	.1**	.1**	.1**	.1**	.0**	.0**	.1**	.1**	.0**	.0**	.1**	.1**	.1**	.1**	.0**	.1**	.1**	.0**	.1**	.1**	.1**	.1**	.1**	.1**	.1**	.1**	.1**
	Dm	.0**	.0*	.0**	.0**	.0**	1	.0**	.0**	.0**	.0**	.0**	.0**	0	.0**	.0**	.0**	.0**	.0**	.0**	.0**	.0**	.0**	.0**	.0**	.0**	.0*	.0**	.0**	.0**	.0**	.0**	.0**	.0**	.0**	.0**	0.8	.0**	.0**	.0*	.0**	.0**	.0**	.0**	.0**	.0**	.0**	.0**	.0**
	E♭M	.1**	.1**	.0**	.1**	.1**	.0**	1	.1**	.1**	.1**	.1**	.1**	.0**	.1**	.1**	.1**	.0**	.1**	.1**	.1**	.0**	.1**	.2**	.1**	.1**	.1**	.0**	.1**	.1**	.1**	.0**	.1**	.1**	.1**	.1**	.0**	.1**	.1**	.0**	.1**	.1**	.1**	.1**	.1**	.1**	.1**	.1**	.0**
	E♭m	.1**	.1**	.1**	.1**	.1**	.0**	.1**	1	.1**	.2**	.1**	.1**	.0**	.1**	.1**	.1**	.1**	.1**	.1**	.2**	.1**	.2**	.2**	.1**	.1**	.1**	.1**	.2**	.1**	.1**	.0**	.1**	.2**	.2**	.2**	.0**	.1**	.1**	.0**	.1**	.2**	.1**	.1**	.1**	.1**	.2**	.1**	.1**
	EM	.1**	.1**	.1**	.1**	.1**	.0**	.1**	.1**	1	.2**	.1**	.1**	.1**	.1**	.1**	.2**	.1**	.1**	.1**	.2**	.0**	.2**	.2**	.1**	.2**	.1**	.1**	.2**	.1**	.1**	.0**	.1**	.2**	.1**	.2**	.1**	.1**	.1**	.0**	.1**	.1**	.1**	.1**	.1**	.2**	.2**	.1**	.1**
	Em	.1**	.1**	.1**	.1**	.1**	.0**	.1**	.2**	.2**	1	.1**	.1**	.0**	.1**	.1**	.1**	.0**	.1**	.1**	.2**	.0**	.1**	.1**	.1**	.1**	.1**	.1**	.1**	.1**	.1**	.0**	.1**	.1**	.1**	.1**	.1**	.1**	.1**	.0**	.1**	.1**	.1**	.1**	.1**	.1**	.1**	.1**	.1**
	FM	.1**	.1**	.1**	.1**	.0**	.0**	.1**	.1**	.1**	.1**	1	.1**	.0**	.1**	.1**	.1**	.1**	.1**	.1**	.1**	.0**	.1**	.1**	.1**	.1**	.0**	.1**	.1**	.1**	.1**	.1**	.1**	.1**	.1**	.1**	.1**	.1**	.1**	.0**	.1**	.1**	.1**	.1**	.1**	.1**	.1**	.1**	.1**
	Fm	.1**	.0**	.1**	.1**	.1**	.0**	.1**	.1**	.1**	.1**	.1**	1	.0**	.1**	.1**	.1**	.0**	.1**	.1**	.2**	.0**	.2**	.2**	.1**	.1**	.1**	.1**	.1**	.1**	.1**	.0**	.1**	.1**	.1**	.2**	.1**	.1**	.1**	.0**	.1**	.1**	.0**	.1**	.1**	.1**	.1**	.1**	.1**
	F#M	.0**	0.8	.0**	.0**	.0**	0	.0**	.0**	.1**	.0**	.0**	.0**	1	.0**	.0**	.0**	.0**	.0**	.0**	.0**	.0**	.0**	.1**	.0**	.0**	.0**	.0**	.0**	.0**	.0**	.0*	.0**	.1**	.0**	.1**	.0**	.0**	.0**	.0**	.0**	.0**	.0**	.0**	.0**	.0**	.0**	.0**	.0**
	F#m	.1**	.0**	.1**	.1**	.1**	.0**	.1**	.1**	.1**	.1**	.1**	.1**	.0**	1	.1**	.1**	.1**	.1**	.1**	.1**	.0**	.1**	.1**	.1**	.1**	.1**	.0**	.1**	.1**	.1**	.0**	.1**	.1**	.1**	.1**	.0**	.1**	.1**	.0**	.0**	.1**	.1**	.1**	.1**	.1**	.1**	.1**	.0**
	GM	.1**	.0**	.1**	.1**	.0**	.0**	.1**	.1**	.1**	.1**	.1**	.1**	.0**	.1**	1	.1**	.1**	.1**	.1**	.1**	.1**	.1**	.1**	.1**	.1**	.0**	.0**	.1**	.1**	.1**	.0**	.1**	.1**	.1**	.1**	.1**	.0**	.1**	.1**	.1**	.1**	.1**	.1**	.1**	.1**	.1**	.1**	.1**
	Gm	.1**	.1**	.1**	.1**	.1**	.0**	.1**	.1**	.2**	.1**	.1**	.1**	.0**	.1**	.1**	1	.0**	.1**	.1**	.2**	.0**	.1**	.2**	.1**	.1**	.1**	.1**	.1**	.1**	.1**	.0**	.1**	.1**	.1**	.2**	.1**	.0**	.1**	.1**	.1**	.1**	.2**	.1**	.1**	.1**	.2**	.1**	.1**
	A♭M	.0**	.0**	.1**	.0**	.0**	.0**	.0**	.1**	.1**	.0**	.1**	.0**	.0**	.1**	.1**	.0**	1	.0**	.0**	.1**	.0**	.1**	.1**	.0**	.1**	.0**	.0**	.0**	.1**	.0**	.0**	.0**	.1**	.0**	.0**	.0**	.0**	.1**	.1**	.0**	.0**	.0**	.0**	.0**	.0**	.0**	.0**	.0**
	G#m	.0**	.1**	.1**	.1**	.1**	.0**	.1**	.1**	.1**	.1**	.1**	.1**	.0**	.1**	.1**	.1**	.0**	1	.1**	.1**	.0**	.1**	.2**	.1**	.1**	.0**	.1**	.1**	.0**	.1**	.0**	.1**	.1**	.1**	.1**	.0**	.0**	.1**	.0**	.1**	.1**	.0**	.1**	.1**	.1**	.1**	.1**	.0**
	AM	.1**	.0**	.1**	.1**	.1**	.0**	.1**	.1**	.1**	.1**	.1**	.1**	.0**	.1**	.1**	.1**	.0**	.1**	1	.1**	.0**	.1**	.1**	.1**	.1**	.0**	.1**	.1**	.1**	.1**	.0**	.1**	.1**	.1**	.1**	.0**	.1**	.1**	.0**	.1**	.1**	.0**	.1**	.1**	.1**	.1**	.1**	.0**
	Am	.1**	.1**	.1**	.1**	.1**	.0**	.1**	.2**	.2**	.2**	.1**	.2**	.0**	.1**	.1**	.2**	.1**	.1**	.1**	1	.1**	.2**	.3**	.1**	.1**	.1**	.1**	.1**	.1**	.1**	.0**	.1**	.2**	.1**	.2**	.1**	.1**	.1**	.0**	.1**	.2**	.1**	.1**	.1**	.1**	.2**	.1**	.1**
	B♭M	.1**	.0**	.0**	.1**	.0**	.0**	.0**	.1**	.0**	.0**	.0**	.0**	.0**	.0**	.1**	.0**	.0**	.0**	.0**	.1**	1	.1**	.1**	.0**	.0**	.0**	.0**	.0**	.1**	.1**	.0**	.0**	.1**	.0**	.1**	.0**	.0**	.0**	.0**	.0**	.0**	.0**	.0**	.0**	.0**	.1**	.0**	.0**
	B♭m	.1**	.1**	.1**	.2**	.1**	.0**	.1**	.2**	.2**	.1**	.1**	.2**	.0**	.1**	.1**	.1**	.1**	.1**	.1**	.2**	.1**	1	.2**	.1**	.1**	.1**	.1**	.1**	.1**	.1**	.0**	.1**	.2**	.1**	.2**	.1**	.1**	.1**	.0**	.1**	.1**	.1**	.1**	.1**	.1**	.2**	.1**	.1**
	BM	.1**	.1**	.1**	.2**	.1**	.0**	.2**	.2**	.2**	.1**	.1**	.2**	.1**	.1**	.1**	.2**	.1**	.2**	.1**	.3**	.1**	.2**	1	.2**	.2**	.1**	.1**	.2**	.1**	.1**	.1**	.1**	.2**	.1**	.2**	.1**	.1**	.1**	.1**	.2**	.2**	.1**	.2**	.1**	.1**	.2**	.1**	.1**
	Bm	.1**	.0**	.0**	.1**	.1**	.0**	.1**	.1**	.1**	.1**	.1**	.1**	.0**	.1**	.1**	.1**	.0**	.1**	.1**	.1**	.0**	.1**	.2**	1	.1**	.0**	.0**	.1**	.1**	.1**	.0**	.1**	.1**	.1**	.1**	.0**	.0**	.1**	.0**	.1**	.1**	.1**	.1**	.1**	.0**	.1**	.0**	.0**
No2	CM	.1**	.1**	.0**	.1**	.1**	.0**	.1**	.1**	.2**	.1**	.1**	.1**	.0**	.1**	.1**	.1**	.1**	.1**	.1**	.1**	.0**	.1**	.2**	.1**	1	.1**	.1**	.1**	.1**	.1**	.0**	.0**	.1**	.1**	.2**	.1**	.1**	.1**	.0**	.1**	.1**	.1**	.1**	.1**	.1**	.1**	.1**	.0**
	Cm	.0**	.1**	.0**	.1**	.0**	.0*	.1**	.1**	.1**	.1**	.0**	.1**	.0**	.1**	.0**	.1**	.0**	.0**	.0**	.1**	.0**	.1**	.1**	.0**	.1**	1	.0**	.1**	.0**	.0**	.0**	.1**	.1**	.0**	.1**	.0**	.0**	.1**	.0**	.1**	.1**	.1**	.0**	.0**	.0**	.1**	.0**	.0**
	DbM	.1**	.0**	.1**	.1**	.0**	.0**	.0**	.1**	.1**	.1**	.1**	.1**	.0**	.0**	.0**	.1**	.0**	.1**	.1**	.1**	.0**	.1**	.1**	.0**	.1**	.0**	1	.1**	.1**	.0**	.0**	.0**	.1**	.1**	.1**	.0**	.0**	.1**	.0**	.0**	.1**	.1**	.1**	.0**	.1**	.1**	.1**	.1**
	Dbm	.1**	.0**	.0**	.2**	.1**	.0**	.1**	.2**	.2**	.1**	.1**	.1**	.0**	.1**	.1**	.1**	.0**	.1**	.1**	.1**	.0**	.1**	.2**	.1**	.1**	.1**	.1**	1	.1**	.1**	.0**	.1**	.1**	.1**	.1**	.0**	.1**	.1**	.0**	.1**	.1**	.1**	.1**	.1**	.1**	.1**	.1**	.1**
	DM	.1**	.0**	.1**	.1**	.1**	.0**	.1**	.1**	.1**	.1**	.1**	.1**	.0**	.1**	.1**	.1**	.1**	.0**	.1**	.1**	.1**	.1**	.1**	.1**	.1**	.0**	.1**	.1**	1	.1**	.0**	.1**	.1**	.1**	.1**	.1**	.1**	.1**	.0**	.1**	.1**	.1**	.1**	.1**	.1**	.1**	.1**	.1**
	Dm	.1**	.0**	.1**	.1**	.0**	.0**	.1**	.1**	.1**	.1**	.1**	.1**	.0**	.1**	.1**	.1**	.0**	.1**	.1**	.1**	.1**	.1**	.1**	.1**	.1**	.0**	.0**	.1**	.1**	1	.0**	.1**	.1**	.1**	.1**	.0**	.0**	.1**	.0**	.0**	.1**	.1**	.1**	.1**	.0**	.1**	.1**	.0**
	E♭M	.0**	.0**	.0**	.0**	.0**	.0**	.0**	.0**	.0**	.0**	.1**	.0**	.0*	.0**	.0**	.0**	.0**	.0**	.0**	.0**	.0**	.0**	.1**	.0**	.0**	.0**	.0**	.0**	.0**	.0**	1	.0**	.0**	.0**	.0**	.0**	.0**	.0**	.0**	.0**	.0**	.0**	.0**	.0**	.0**	.0**	.0**	.0**
	E♭m	.1**	.0**	.0**	.2**	.1**	.0**	.1**	.1**	.1**	.1**	.1**	.1**	.0**	.1**	.1**	.1**	.0**	.1**	.1**	.1**	.0**	.1**	.1**	.1**	.0**	.1**	.0**	.1**	.1**	.1**	.0**	1	.1**	.1**	.1**	.0**	.0**	.1**	.0**	.1**	.1**	.1**	.1**	.1**	.1**	.2**	.1**	.0**
	EM	.1**	.1**	.1**	.1**	.1**	.0**	.1**	.2**	.2**	.1**	.1**	.1**	.1**	.1**	.1**	.1**	.1**	.1**	.1**	.2**	.1**	.2**	.2**	.1**	.1**	.1**	.1**	.1**	.1**	.1**	.0**	.1**	1	.1**	.1**	.1**	.1**	.1**	.0**	.1**	.1**	.1**	.1**	.1**	.1**	.1**	.1**	.1**
	Em	.1**	.0**	.1**	.1**	.1**	.0**	.1**	.2**	.1**	.1**	.1**	.1**	.0**	.1**	.1**	.1**	.0**	.1**	.1**	.1**	.0**	.1**	.1**	.1**	.1**	.0**	.1**	.1**	.1**	.1**	.0**	.1**	.1**	1	.1**	.0**	.0**	.1**	.0**	.1**	.1**	.1**	.1**	.1**	.1**	.1**	.1**	.1**
	FM	.1**	.1**	.1**	.1**	.1**	.0**	.1**	.2**	.2**	.1**	.1**	.2**	.1**	.1**	.1**	.2**	.0**	.1**	.1**	.2**	.1**	.2**	.2**	.1**	.2**	.1**	.1**	.1**	.1**	.1**	.0**	.1**	.1**	.1**	1	.1**	.1**	.1**	.0**	.1**	.1**	.1**	.1**	.1**	.1**	.2**	.1**	.1**
	Fm	.0**	.0**	.0**	.1**	.0**	0.8	.0**	.0**	.1**	.1**	.1**	.1**	.0**	.0**	.1**	.1**	.0**	.0**	.0**	.1**	.0**	.1**	.1**	.0**	.1**	.0**	.0**	.0**	.1**	.0**	.0**	.0**	.1**	.0**	.1**	1	.0**	.1**	.0**	.1**	.0**	.0**	.0**	.0**	.0**	.0**	.0**	.0**
	F#M	.0**	.0**	.0**	.0**	.1**	.0**	.1**	.1**	.1**	.1**	.1**	.1**	.0**	.1**	.0**	.0**	.0**	.0**	.1**	.1**	.0**	.1**	.1**	.0**	.1**	.0**	.0**	.1**	.1**	.0**	.0**	.0**	.1**	.0**	.1**	.0**	1	.1**	.0**	.0**	.1**	.0**	.0**	.0**	.1**	.1**	.1**	.0**
	F#m	.1**	.1**	.1**	.1**	.1**	.0**	.1**	.1**	.1**	.1**	.1**	.1**	.0**	.1**	.1**	.1**	.1**	.1**	.1**	.1**	.0**	.1**	.1**	.1**	.1**	.1**	.1**	.1**	.1**	.1**	.0**	.1**	.1**	.1**	.1**	.1**	.1**	1	.0**	.1**	.1**	.1**	.1**	.1**	.1**	.2**	.1**	.1**
	GM	.0**	.0**	.0**	.0**	.0**	.0*	.0**	.0**	.0**	.0**	.0**	.0**	.0**	.0**	.1**	.1**	.1**	.0**	.0**	.0**	.0**	.0**	.1**	.0**	.0**	.0**	.0**	.0**	.0**	.0**	.0**	.0**	.0**	.0**	.0**	.0**	.0**	.0**	1	.0**	.0**	.0**	.0**	.0**	.0**	.0**	.0**	.0**
	Gm	.1**	.0**	.0**	.1**	.1**	.0**	.1**	.1**	.1**	.1**	.1**	.1**	.0**	.0**	.1**	.1**	.0**	.1**	.1**	.1**	.0**	.1**	.2**	.1**	.1**	.1**	.0**	.1**	.1**	.0**	.0**	.1**	.1**	.1**	.1**	.1**	.0**	.1**	.0**	1	.1**	.1**	.1**	.1**	.1**	.1**	.1**	.1**
	A♭M	.1**	.0**	.1**	.1**	.1**	.0**	.1**	.2**	.1**	.1**	.1**	.1**	.0**	.1**	.1**	.1**	.0**	.1**	.1**	.2**	.0**	.1**	.2**	.1**	.1**	.1**	.1**	.1**	.1**	.1**	.0**	.1**	.1**	.1**	.1**	.0**	.1**	.1**	.0**	.1**	1	.1**	.1**	.1**	.1**	.1**	.1**	.0**
	G#m	.1**	.0**	.0**	.1**	.1**	.0**	.1**	.1**	.1**	.1**	.1**	.0**	.0**	.1**	.1**	.2**	.0**	.0**	.0**	.1**	.0**	.1**	.1**	.1**	.1**	.1**	.1**	.1**	.1**	.1**	.0**	.1**	.1**	.1**	.1**	.0**	.0**	.1**	.0**	.1**	.1**	1	.1**	.1**	.1**	.1**	.1**	.1**
	AM	.1**	.0**	.1**	.1**	.1**	.0**	.1**	.1**	.1**	.1**	.1**	.1**	.0**	.1**	.1**	.1**	.0**	.1**	.1**	.1**	.0**	.1**	.2**	.1**	.1**	.0**	.1**	.1**	.1**	.1**	.0**	.1**	.1**	.1**	.1**	.0**	.0**	.1**	.0**	.1**	.1**	.1**	1	.0**	.1**	.1**	.1**	.1**
	Am	.1**	.0**	.0**	.1**	.1**	.0**	.1**	.1**	.1**	.1**	.1**	.1**	.0**	.1**	.1**	.1**	.0**	.1**	.1**	.1**	.0**	.1**	.1**	.1**	.1**	.0**	.0**	.1**	.1**	.1**	.0**	.1**	.1**	.1**	.1**	.0**	.0**	.1**	.0**	.1**	.1**	.1**	.0**	1	.1**	.1**	.1**	.1**
	B♭M	.1**	.0**	.0**	.1**	.1**	.0**	.1**	.1**	.2**	.1**	.1**	.1**	.0**	.1**	.1**	.1**	.0**	.1**	.1**	.1**	.0**	.1**	.1**	.0**	.1**	.0**	.1**	.1**	.1**	.0**	.0**	.1**	.1**	.1**	.1**	.0**	.1**	.1**	.0**	.1**	.1**	.1**	.1**	.1**	1	.1**	.1**	.0**
	B♭m	.1**	.1**	.1**	.1**	.1**	.0**	.1**	.2**	.2**	.1**	.1**	.1**	.0**	.1**	.1**	.2**	.0**	.1**	.1**	.2**	.1**	.2**	.2**	.1**	.1**	.1**	.1**	.1**	.1**	.1**	.0**	.2**	.1**	.1**	.2**	.0**	.1**	.2**	.0**	.1**	.1**	.1**	.1**	.1**	.1**	1	.1**	.1**
	BM	.1**	.0**	.1**	.1**	.1**	.0**	.1**	.1**	.1**	.1**	.1**	.1**	.0**	.1**	.1**	.1**	.0**	.1**	.1**	.1**	.0**	.1**	.1**	.0**	.1**	.0**	.1**	.1**	.1**	.1**	.0**	.1**	.1**	.1**	.1**	.0**	.1**	.1**	.0**	.1**	.1**	.1**	.1**	.1**	.1**	.1**	1	.1**
	Bm	.0**	.0**	.0**	.1**	.1**	.0**	.0**	.1**	.1**	.1**	.1**	.1**	.0**	.0**	.1**	.1**	.0**	.0**	.0**	.1**	.0**	.1**	.1**	.0**	.0**	.0**	.1**	.1**	.1**	.0**	.0**	.0**	.1**	.1**	.1**	.0**	.0**	.1**	.0**	.1**	.0**	.1**	.1**	.1**	.0**	.1**	.1**	1

## Sheet: 5th-order
		No1																								No2
		CM	Cm	DbM	Dbm	DM	Dm	E♭M	E♭m	EM	Em	FM	Fm	F#M	F#m	GM	Gm	A♭M	G#m	AM	Am	B♭M	B♭m	BM	Bm	CM	Cm	DbM	Dbm	DM	Dm	E♭M	E♭m	EM	Em	FM	Fm	F#M	F#m	GM	Gm	A♭M	G#m	AM	Am	B♭M	B♭m	BM	Bm
No1	CM	1	.0**	.0**	.0**	.0**	0	.0**	.0**	.0**	.0**	.0**	.0**	0	.0**	.1**	.0**	.0**	.0*	.0**	.0**	.0**	.0**	.1**	.0**	.0**	0	.0**	.0**	.0**	.0**	0	.0**	.0**	.0**	.0**	.0**	.0**	.0**	.0**	.0**	.0**	.0**	.0**	.0**	.0**	.0**	.0**	.0**
	Cm	.0**	1	.0*	.0**	0	-.0*	.0**	.0**	.0**	.0**	.0**	.0**	0	.0**	.0**	.0**	0	.0**	0	.0**	.0**	.0**	.0**	.0**	.0**	.0**	.0**	.0**	.0**	.0**	0	.0**	.0**	.0**	.0**	.0**	0	.0**	0	0	.0**	0	0	.0**	.0**	.0**	.0**	.0*
	DbM	.0**	.0*	1	.0**	.0**	0	.0**	.0**	.0**	.0**	.0**	.0**	.0**	.0**	.0**	.0**	.0**	.0**	.0**	.0**	.0**	.0**	.0**	.0**	.0**	.0*	.0**	.0**	.0**	.0**	0	.0**	.0**	.0**	.0**	.0**	0	.0**	.0*	0	.0**	.0**	.0**	.0**	.0**	.0**	.0**	.0**
	Dbm	.0**	.0**	.0**	1	.0**	.0**	.1**	.1**	.1**	.0**	.0**	.0**	.0**	.0**	.0**	.0**	.0**	.0**	.0**	.1**	.1**	.1**	.1**	.0**	.0**	.0**	.0**	.1**	.0**	.0**	.0**	.1**	.1**	.0**	.0**	.0**	0	.0**	.0**	.0**	.0**	.0**	.0**	.0**	.0**	.0**	.0**	.0**
	DM	.0**	0	.0**	.0**	1	-.0*	.0**	.0**	.0**	.0**	.0**	.0**	0	.0**	.0**	.0**	0	.0**	.0**	.0**	.0**	.0**	.0**	.0**	.0**	0	.0**	.0**	.0**	.0**	0	.0**	.0**	.0**	.0**	0	.0**	.0**	0	.0**	.0**	.0**	.0**	.0**	.0**	.0**	.0**	.0*
	Dm	0	-.0*	0	.0**	-.0*	1	0	0	0	0	0	0	-.0*	.0**	0	0	0	0	0	.0**	.0**	.0**	0	-.0*	0	0	0	0	0	0	-.0**	0	.0**	0	.0**	0	0	-0.9	-0.3		0	-0.4	-0.6	0	-0.3	.0**	-0.5	-.
	E♭M	.0**	.0**	.0**	.1**	.0**	0	1	.1**	.1**	.0**	.0**	.0**	0	.0**	.0**	.0**	.0**	.0**	.0**	.1**	.0**	.1**	.1**	.0**	.0**	.0**	.0**	.0**	.0**	.0**	0	.0**	.1**	.0**	.1**	.0**	.0**	.0**	.0**	.0**	.0**	.0**	.0**	.0**	.0**	.0**	.0**	.0**
	E♭m	.0**	.0**	.0**	.1**	.0**	0	.1**	1	.1**	.1**	.0**	.0**	0	.0**	.0**	.1**	.0**	.0**	.0**	.1**	.0**	.1**	.1**	.1**	.0**	.0**	.0**	.0**	.0**	.0**	.0**	.0**	.1**	.1**	.1**	.0**	.0**	.0**	.0**	.0**	.1**	.0**	.0**	.0**	.0**	.1**	.0**	.0**
	EM	.0**	.0**	.0**	.1**	.0**	0	.1**	.1**	1	.1**	.0**	.1**	.0**	.1**	.1**	.1**	.0**	.0**	.0**	.1**	.0**	.1**	.1**	.1**	.0**	.0**	.1**	.1**	.0**	.0**	.0*	.0**	.1**	.1**	.1**	.0**	.0**	.1**	.0**	.0**	.1**	.0**	.0**	.0**	.1**	.1**	.0**	.0**
	Em	.0**	.0**	.0**	.0**	.0**	0	.0**	.1**	.1**	1	.0**	.0**	0	.0**	.0**	.0**	.0**	.0**	.0**	.1**	.0**	.0**	.1**	.0**	.0**	.0**	.0**	.0**	.0**	.0**	.0**	.0**	.0**	.0**	.0**	.0**	.0**	.0**	.0**	.0**	.0**	.0**	.0**	.0**	.0**	.0**	.0**	.0**
	FM	.0**	.0**	.0**	.0**	.0**	0	.0**	.0**	.0**	.0**	1	.0**	0	.0**	.0**	.0**	.0**	.0**	.0**	.0**	.0**	.0**	.1**	.0**	.0**	.0*	.0**	.0**	.0**	.0**	.0*	.0**	.0**	.0**	.0**	.0**	.0**	.0**	.0**	.0**	.0**	.0**	.0**	.0**	.0**	.0**	.0**	.0**
	Fm	.0**	.0**	.0**	.0**	.0**	0	.0**	.0**	.1**	.0**	.0**	1	0	.0**	.0**	.0**	.0**	.0**	.0**	.1**	.0**	.0**	.1**	.0**	.0**	.0**	.0**	.0**	.0**	.0**	0	.0**	.0**	.0**	.0**	.0**	.0**	.0**	.0**	.0**	.0**	.0**	.0**	.0**	.0**	.0**	.0**	.0**
	F#M	0	0	.0**	.0**	0	-.0*	0	0	.0**	0	0	0	1	0	0	0	0	0	0	0	0	.0**	.0**	0	.0**	0	0	.0**	0	0	-.0*	0	.0**	.0*	.0**	0	0	.0**	-0.1		-0.2	0	0		-0.3	.0*	.0**	0
	F#m	.0**	.0**	.0**	.0**	.0**	.0**	.0**	.0**	.1**	.0**	.0**	.0**	0	1	.0**	.0**	.0**	.0**	.0**	.0**	.0**	.0**	.0**	.0**	.0**	.0**	.0*	.0**	.0**	.0**	0	.0**	.0**	.1**	.0**	.0**	.0**	.0**	0	0	.0**	.0**	.0**	.0**	.0**	.1**	.0**	.0**
	GM	.1**	.0**	.0**	.0**	.0**	0	.0**	.0**	.1**	.0**	.0**	.0**	0	.0**	1	.0**	.0**	.0**	.0**	.1**	.0**	.0**	.1**	.0**	.0**	.0**	.0**	.0**	.0**	.0**	0	.0**	.0**	.1**	.0**	.0**	.0**	.1**	.0**	.0**	.0**	.0**	.0**	.0**	.0**	.1**	.0**	.0**
	Gm	.0**	.0**	.0**	.0**	.0**	0	.0**	.1**	.1**	.0**	.0**	.0**	0	.0**	.0**	1	.0**	.0**	.0**	.1**	.0**	.1**	.1**	.0**	.0**	.0**	.0**	.0**	.0**	.0**	.0**	.1**	.0**	.0**	.1**	.0**	.0*	.0**	.0**	.0**	.0**	.1**	.0**	.0**	.0**	.1**	.0**	.0**
	A♭M	.0**	0	.0**	.0**	0	0	.0**	.0**	.0**	.0**	.0**	.0**	0	.0**	.0**	.0**	1	.0**	.0**	.0**	.0**	.0**	.0**	.0**	.0*	0	.0**	0	.0**	0	0	.0**	.0**	.0**	.0**	.0**	0	.0**	.0**	0	.0*	.0**	0	.0**	0	.0**	0	.0**
	G#m	.0*	.0**	.0**	.0**	.0**	0	.0**	.0**	.0**	.0**	.0**	.0**	0	.0**	.0**	.0**	.0**	1	.0**	.0**	.0**	.0**	.0**	.0**	.0**	.0**	.0**	.0**	.0**	.0**	0	.0**	.0**	.0**	.0**	.0**	.0*	.0**	.0**	.0**	.0**	.0**	.0**	0	.0**	.0**	.0**	.0*
	AM	.0**	0	.0**	.0**	.0**	0	.0**	.0**	.0**	.0**	.0**	.0**	0	.0**	.0**	.0**	.0**	.0**	1	.0**	.0**	.0**	.0**	.0**	.0**	.0**	.0**	.0**	.0**	.0**	0	.0**	.0**	.0**	.0**	.0**	.0**	.0**	.0**	.0**	.0**	.0*	.0**	.0**	.0**	.0**	.0**	.0**
	Am	.0**	.0**	.0**	.1**	.0**	.0**	.1**	.1**	.1**	.1**	.0**	.1**	0	.0**	.1**	.1**	.0**	.0**	.0**	1	.0**	.1**	.1**	.0**	.0**	.0**	.0**	.0**	.1**	.0**	.0*	.0**	.1**	.1**	.1**	.0**	.0**	.0**	.0**	.0**	.1**	.0**	.0**	.0**	.0**	.1**	.0**	.0**
	B♭M	.0**	.0**	.0**	.1**	.0**	.0**	.0**	.0**	.0**	.0**	.0**	.0**	0	.0**	.0**	.0**	.0**	.0**	.0**	.0**	1	.0**	.1**	.0**	.0**	.0**	.0**	.0**	.0**	.0**	0	.0**	.0**	.0**	.1**	.0**	0	.0**	.0**	.0**	.0**	.0**	.0**	.0**	.0**	.0**	.0**	.0**
	B♭m	.0**	.0**	.0**	.1**	.0**	.0**	.1**	.1**	.1**	.0**	.0**	.0**	.0**	.0**	.0**	.1**	.0**	.0**	.0**	.1**	.0**	1	.1**	.0**	.0**	.0**	.0**	.0**	.0**	.0**	0	.0**	.1**	.1**	.1**	.0**	.0**	.0**	.0**	.0**	.0**	.0**	.0**	.0**	.0**	.1**	.0**	.0**
	BM	.1**	.0**	.0**	.1**	.0**	0	.1**	.1**	.1**	.1**	.1**	.1**	.0**	.0**	.1**	.1**	.0**	.0**	.0**	.1**	.1**	.1**	1	.1**	.0**	.0**	.1**	.0**	.0**	.1**	.0**	.0**	.1**	.1**	.1**	.1**	.0**	.0**	.0**	.0**	.1**	.0**	.0**	.0**	.1**	.1**	.0**	.1**
	Bm	.0**	.0**	.0**	.0**	.0**	-.0*	.0**	.1**	.1**	.0**	.0**	.0**	0	.0**	.0**	.0**	.0**	.0**	.0**	.0**	.0**	.0**	.1**	1	.0**	.0**	.0**	.0**	.0**	.0**	0	.0**	.0**	.0**	.0**	.0**	0	.0**	.0*	.0**	.0**	.0**	.0**	.0**	.0**	.0**	.0**	.0**
	CM	.0**	.0**	.0**	.0**	.0**	0	.0**	.0**	.0**	.0**	.0**	.0**	.0**	.0**	.0**	.0**	.0*	.0**	.0**	.0**	.0**	.0**	.0**	.0**	1	.0**	.0**	.0**	.0**	.0**	0	.0**	.0**	.0**	.0**	.0**	.0**	.0**	0	.0**	.0**	.0**	.0**	.0*	.0**	.0**	.0**	.0**
No2	Cm	0	.0**	.0*	.0**	0	0	.0**	.0**	.0**	.0**	.0*	.0**	0	.0**	.0**	.0**	0	.0**	.0**	.0**	.0**	.0**	.0**	.0**	.0**	1	.0**	.0**	.0**	.0*	0	.0**	.0**	.0**	.0**	.0**	0	.0**	0	0	.0**	.0**	0	.0**	.0**	.0**	.0**	.0**
	DbM	.0**	.0**	.0**	.0**	.0**	0	.0**	.0**	.1**	.0**	.0**	.0**	0	.0*	.0**	.0**	.0**	.0**	.0**	.0**	.0**	.0**	.1**	.0**	.0**	.0**	1	.0**	.0**	.0**	.0**	.0**	.0**	.0**	.0**	.0**	.0**	.0**	.0**	0	.0**	.0**	.0**	.0**	.0**	.0**	.0**	.0**
	Dbm	.0**	.0**	.0**	.1**	.0**	0	.0**	.0**	.1**	.0**	.0**	.0**	.0**	.0**	.0**	.0**	0	.0**	.0**	.0**	.0**	.0**	.0**	.0**	.0**	.0**	.0**	1	.0**	.0**	.0**	.0**	.0**	.0**	.0**	.0*	.0**	.0**	.0*	.0**	.0**	.0**	.0**	.0**	.0**	.0**	.0**	.0**
	DM	.0**	.0**	.0**	.0**	.0**	0	.0**	.0**	.0**	.0**	.0**	.0**	0	.0**	.0**	.0**	.0**	.0**	.0**	.1**	.0**	.0**	.0**	.0**	.0**	.0**	.0**	.0**	1	.0**	.0**	.0**	.1**	.0**	.0**	.0**	.0**	.0**	.0**	.0**	.0**	.0**	.0**	.0**	.0**	.0**	.0**	.0**
	Dm	.0**	.0**	.0**	.0**	.0**	0	.0**	.0**	.0**	.0**	.0**	.0**	0	.0**	.0**	.0**	0	.0**	.0**	.0**	.0**	.0**	.1**	.0**	.0**	.0*	.0**	.0**	.0**	1	0	.0**	.0**	.0**	.0**	.0**	0	.0**	.0**	.0*	.0**	.0**	.0**	.0**	.0**	.0**	.0**	.0**
	E♭M	0	0	0	.0**	0	-.0**	0	.0**	.0*	.0**	.0*	0	-.0*	0	0	.0**	0	0	0	.0*	0	0	.0**	0	0	0	.0**	.0**	.0**	0	1	.0*	.0**	0	0	0	0	-0.5		0	0	0	.0**	0	0	0	0
	E♭m	.0**	.0**	.0**	.1**	.0**	0	.0**	.0**	.0**	.0**	.0**	.0**	0	.0**	.0**	.1**	.0**	.0**	.0**	.0**	.0**	.0**	.0**	.0**	.0**	.0**	.0**	.0**	.0**	.0**	.0*	1	.0**	.0**	.0**	.0**	.0*	.0**	.0*	.0**	.0**	.0**	.0**	.0**	.0**	.1**	.0**	.0**
	EM	.0**	.0**	.0**	.1**	.0**	.0**	.1**	.1**	.1**	.0**	.0**	.0**	.0**	.0**	.0**	.0**	.0**	.0**	.0**	.1**	.0**	.1**	.1**	.0**	.0**	.0**	.0**	.0**	.1**	.0**	.0**	.0**	1	.1**	.1**	.0**	.0**	.0**	.0**	.0**	.0**	.0**	.0**	.0**	.0**	.0**	.0**	.0**
	Em	.0**	.0**	.0**	.0**	.0**	0	.0**	.1**	.1**	.0**	.0**	.0**	.0*	.1**	.1**	.0**	.0**	.0**	.0**	.1**	.0**	.1**	.1**	.0**	.0**	.0**	.0**	.0**	.0**	.0**	0	.0**	.1**	1	.1**	.0**	.0**	.0**	.0**	.0**	.0**	.0**	.0**	.0**	.0**	.1**	.0**	.0**
	FM	.0**	.0**	.0**	.0**	.0**	.0**	.1**	.1**	.1**	.0**	.0**	.0**	.0**	.0**	.0**	.1**	.0**	.0**	.0**	.1**	.1**	.1**	.1**	.0**	.0**	.0**	.0**	.0**	.0**	.0**	0	.0**	.1**	.1**	1	.0**	.0**	.0**	.0**	.0**	.0**	.0**	.0**	.0**	.1**	.1**	.0**	.0**
	Fm	.0**	.0**	.0**	.0**	0	0	.0**	.0**	.0**	.0**	.0**	.0**	0	.0**	.0**	.0**	.0**	.0**	.0**	.0**	.0**	.0**	.1**	.0**	.0**	.0**	.0**	.0*	.0**	.0**	0	.0**	.0**	.0**	.0**	1	0	.0**	.0*	.0*	.0**	.0**	-0.2	.0**	.0**	.0**	.0**	.0**
	F#M	.0**	0	0	0	.0**	0	.0**	.0**	.0**	.0**	.0**	.0**	0	.0**	.0**	.0*	0	.0*	.0**	.0**	0	.0**	.0**	0	.0**	0	.0**	.0**	.0**	0	0	.0*	.0**	.0**	.0**	0	1	0	0	0	.0**	.0*	0	0	.0**	.0**	.0**	.0**
	F#m	.0**	.0**	.0**	.0**	.0**	0	.0**	.0**	.1**	.0**	.0**	.0**	.0**	.0**	.1**	.0**	.0**	.0**	.0**	.0**	.0**	.0**	.1**	.0**	.0**	.0**	.0**	.0**	.0**	.0**	0	.0**	.0**	.0**	.0**	.0**	.0*	1	.0*	.0**	.0**	.0**	.0**	.0**	.0**	.0**	.0**	.0**
	GM	.0**	0	.0**	.0**	0	0	.0**	.0**	.0**	.0**	.0**	.0**	0	0	.0**	.0**	.0**	.0**	.0**	.0**	.0**	.0**	.0**	.0*	0	0	.0**	.0**	.0**	.0**	0	.0**	.0**	.0**	.0**	.0*	0	.0*	1	0	0	0	-0.2	0	.0**	.0**	.0*	0
	Gm	.0**	0	0	.0**	.0**	0	.0**	.0**	.0**	.0**	.0**	.0**	0	0	.0**	.0**	0	.0**	.0**	.0**	.0**	.0**	.0**	.0**	.0**	.0*	0	.0**	.0**	.0*	0	.0**	.0**	.0**	.0**	.0*	0	.0**	0	1	.0**	.0**	.0**	0	.0**	.0**	.0**	.0**
	A♭M	.0**	.0**	.0**	.0**	.0**	0	.0**	.1**	.1**	.0**	.0**	.0**	0	.0**	.0**	.0**	.0*	.0**	.0**	.1**	.0**	.0**	.1**	.0**	.0**	.0**	.0**	.0**	.0**	.0**	0	.0**	.0**	.0**	.0**	.0**	.0**	.0**	0	.0**	1	.0**	.0**	.0**	.0**	.0**	.0**	.0**
	G#m	.0**	0	.0**	.0**	.0**	0	.0**	.0**	.0**	.0**	.0**	.0**	0	.0**	.0**	.1**	.0**	.0**	.0*	.0**	.0**	.0**	.0**	.0**	.0**	.0**	.0**	.0**	.0**	.0**	0	.0**	.0**	.0**	.0**	.0**	.0**	.0**	0	.0**	.0**	1	.0**	.0**	.0**	.0**	.0**	.0**
	AM	.0**	0	.0**	.0**	.0**	0	.0**	.0**	.0**	.0**	.0**	.0**	0	.0**	.0**	.0**	0	.0**	.0**	.0**	.0**	.0**	.0**	.0**	.0**	0	.0**	.0**	.0**	.0**	.0**	.0**	.0**	.0**	.0**	0	0	.0**	-0.2	.0**	.0**	.0**	1	0	.0**	.0**	.0**	.0**
	Am	.0**	.0**	.0**	.0**	.0**	0	.0**	.0**	.0**	.0**	.0**	.0**	0	.0**	.0**	.0**	.0**	0	.0**	.0**	.0**	.0**	.0**	.0**	.0*	.0**	.0**	.0**	.0**	.0**	0	.0**	.0**	.0**	.0**	.0**	0	.0**	0	0	.0**	.0**	0	1	.0**	.0**	.0**	.0**
	B♭M	.0**	.0**	.0**	.0**	.0**	0	.0**	.0**	.1**	.0**	.0**	.0**	0	.0**	.0**	.0**	0	.0**	.0**	.0**	.0**	.0**	.1**	.0**	.0**	.0**	.0**	.0**	.1**	.0**	0	.0**	.0**	.0**	.1**	.0**	.0**	.0**	.0**	.0**	.0**	.0**	.0**	.0**	1	.0**	.0**	.0**
	B♭m	.0**	.0**	.0**	.0**	.0**	.0**	.0**	.1**	.1**	.0**	.0**	.0**	.0*	.1**	.1**	.1**	.0**	.0**	.0**	.1**	.0**	.1**	.1**	.0**	.0**	.0**	.0**	.0**	.0**	.0**	0	.1**	.0**	.1**	.1**	.0**	.0**	.0**	.0**	.0**	.0**	.0**	.0**	.0**	.0**	1	.0**	.0**
	BM	.0**	.0**	.0**	.0**	.0**	0	.0**	.0**	.0**	.0**	.0**	.0**	.0**	.0**	.0**	.0**	0	.0**	.0**	.0**	.0**	.0**	.0**	.0**	.0**	.0**	.0**	.0**	.0**	.0**	0	.0**	.0**	.0**	.0**	.0**	.0**	.0**	.0*	.0**	.0**	.0**	.0**	.0**	.0**	.0**	1	.0**
	Bm	.0**	.0*	.0**	.0**	.0*	0	.0**	.0**	.0**	.0**	.0**	.0**	0	.0**	.0**	.0**	.0**	.0*	.0**	.0**	.0**	.0**	.1**	.0**	.0**	.0**	.0**	.0**	.0**	.0**	0	.0**	.0**	.0**	.0**	.0**	.0**	.0**	0	.0**	.0**	.0**	.0**	.0**	.0**	.0**	.0**	1

## Sheet: 6th-order
		No1																								No2
		CM	Cm	DbM	Dbm	DM	Dm	E♭M	E♭m	EM	Em	FM	Fm	F#M	F#m	GM	Gm	A♭M	G#m	AM	Am	B♭M	B♭m	BM	Bm	CM	Cm	DbM	Dbm	DM	Dm	E♭M	E♭m	EM	Em	FM	Fm	F#M	F#m	GM	Gm	A♭M	G#m	AM	Am	B♭M	B♭m	BM	Bm
No1	CM	1	0	0	.0**	0	-0**	.0**	.0**	.0**	.0**	.0**	.0**	-0*	.0*	.0**	.0**	0	-0.7	0	.0**	.0**	.0**	.0**	.0*	-.	-0.2	.0**	-0.1	.0**	0	-.	0	.0**	.0*	.0**	0	0	0	-0.2	-0.4		0	-0.7	-0.4	0	0	0	0
	Cm	0	1	-0.2		-0*	-0**	0	.0*	.0**	.0**	0	0	-0**	0	.0**	.0*	-0.9		-0.2	.0*	.0**	.0**	.0**	-0.6	-0.6	0	-0.2	-0.3	0	-0.4	-0**	-0.1	.0*	0	.0**	0	-0*	-0.2	-0.4	-0**	-0.6	-0**	-0*	0	.0**		-0.1	-0.7
	DbM	0	-0.2	1	.0**	0	-0.1	.0*	.0*	.0**	-0.5	0	0	-0.7	.0*	.0**	0	0	-0.1	0	.0**	.0**	.0**	.0**	0	-0.5	-0.4	.0*	-0.9	.0**	0	-0*	-0.3	.0**	0	.0**	0	-0**	.0**	-0.7	-0.2	-0.8	-0*	-.	0	0	.0*	0	-0.3
	Dbm	.0**		.0**	1	-0.5	-0.8	.0**	.0**	.0**	0	.0*	.0**		.0*	.0**	.0**	-0.3	0	0	.0**	.0**	.0**	.0**	.0**	0	0	.0*	.0**	.0**	.0**	-0.5	.0**	.0**	.0**	.0**	0	-0*	.0*	0	0	.0*	0	-0.1	0	0	0	0	0
	DM	0	-0*	0	-0.5	1	-0**	0	.0*	.0**	0	0	0	-0*	-0.4	-0.9	0	-0.2	-0.3	0	0	0	0	.0**	0	0	-0*	0	-0.3	0	-0.5	-0**		.0*	0	0	-.	-0**	-0*	-0.4	-0.5	-0.9	-0*	-0.4	0	0	-0.6	-0.3	-0.6
	Dm	-0**	-0**	-0.1	-0.8	-0**	1	-0**	-0**	-0**	-0*	-0.3	-0*	-0**	-0.3	-0**	-0*	-0*	-.	-0*	-0.2	0	0	-0*	-0**	-0.5	-0**	-0**	-0**	-0*	-0*	-0**	-0**	0	-0.2	-0.6	-0**	-0**	-0**	-0**	-0**	-0**	-0**	-0**	-0.3	-0**	-0.4	-0**	-0**
	E♭M	.0**	0	.0*	.0**	0	-0**	1	.0**	.0**	.0**	.0**	.0**	-0.7	.0*	.0**	.0**	.0*	.0**	.0**	.0**	.0**	.0**	.0**	.0**	-0.1	0	.0**	0	.0**	.0**	-0*	.0**	.0**	.0**	.0**	.0**	-0.3	0	.0**		.0*	-0.3	-0.8	.0**	.0**	.0**	.0**	0
	E♭m	.0**	.0*	.0*	.0**	.0*	-0**	.0**	1	.0**	.0**	.0**	.0**	-0*	.0**	.0**	.0**	.0**	.0*	.0*	.0**	.0**	.0**	.0**	.0**	0	-0.4	.0**	.0*	.0**	.0**	-0.6	.0**	.0**	.0**	.0**	0	0	.0**	-0.6	0	.0**	0	0	.0**	.0**	.0**	.0**	.0*
	EM	.0**	.0**	.0**	.0**	.0**	-0**	.0**	.0**	1	.0**	.0**	.0**	-0.1	.0**	.0**	.0**	-0.2	0	.0**	.0**	.0**	.0**	.1**	.0**	0	0	.0**	.0*	.0**	.0**	-0.1	.0**	.0**	.0**	.0**	.0**	0	.0**	.0*	-0.2	.0**	.0*	.0*	.0**	.0**	.0**	.0**	.0**
	Em	.0**	.0**	-0.5	0	0	-0*	.0**	.0**	.0**	1	0	0	-0*	0	.0**	.0*	-0.1	0	.0**	.0**	.0**	.0*	.0**	.0**	0	0	0	0	.0**	.0*	-0.6	.0**	.0**	.0**	.0**	.0**	-0**	.0**	-0.7	0	.0**	-0.4	-0.8	.0**	.0*	.0**	.0*	0
	FM	.0**	0	0	.0*	0	-0.3	.0**	.0**	.0**	0	1	0	-0*	-0.2	.0*	.0**	0	-0.1	.0*	.0**	.0**	.0**	.0**	.0**	-0.2	-0*	0	.0**	.0**	.0**	-0.8	.0**	.0**	.0**	.0**	0	-0.3	0	.0**	-0.4	.0**	0	.0*	-0.4	.0**	0	0	.0**
	Fm	.0**	0	0	.0**	0	-0*	.0**	.0**	.0**	0	0	1	-0*	.0**	.0**	.0**	0	-0.6	0	.0**	.0**	.0**	.0**	.0**	0		0	0	.0**	0	-.	.0**	.0**	.0*	.0**	0	-0.4	-0.2	0	-0.7	-0.4	-0.2	0	0	0	0	-0.3	-0.4
	F#M	-0*	-0**	-0.7		-0*	-0**	-0.7	-0*	-0.1	-0*	-0*	-0*	1	-0**	-0.2	-0*	-.	-0.1	-0*	-0*	-0.9	-0.2	-0.7	-0.2	-0.5	-0*	-0.7	-0.1	-0.3	-0**	-0**	-0**	0	-0.8	0	-0**	-0**	-0*	-0*	-0*	-0**	-0*	-0.9	-0.9	-0*	-0.7	-0.8	-0.1
	F#m	.0*	0	.0*	.0*	-0.4	-0.3	.0*	.0**	.0**	0	-0.2	.0**	-0**	1	.0**	.0**	0	.0*	0	.0**	.0**	.0**	.0**	.0**	-0.6	0	-0.8	0	0	0	-0**	.0**	.0**	.0**	.0**	-0.1	-0.7	0	-0.2	-0**	0		-0.1	.0**	.0*	.0**	.0*	0
	GM	.0**	.0**	.0**	.0**	-0.9	-0**	.0**	.0**	.0**	.0**	.0*	.0**	-0.2	.0**	1	.0**	.0**	.0*	0	.0**	.0**	.0**	.0**	.0**	-0.5	-0.5	0	-0.8	.0**	.0*	-0**	.0**	.0**	.0**	.0**	.0**	-0**	.0**	.0*	-0*	-0.2	0	-0.4	.0**	.0*	.0**	0	.0**
	Gm	.0**	.0*	0	.0**	0	-0*	.0**	.0**	.0**	.0*	.0**	.0**	-0*	.0**	.0**	1	-.	0	.0**	.0**	.0**	.0**	.0**	.0**	0	-0.7	.0**	.0**	0	.0**	-0.7	.0**	.0**	.0**	.0**	.0**	-0.4	.0**	.0**	-0.8	.0*	.0**	0	0	.0**	.0**	-0.3	0
	A♭M	0	-0.9	0	-0.3	-0.2	-0*	.0*	.0**	-0.2	-0.1	0	0	-.	0	.0**	-.	1	-0.4	0	0	0	.0**	.0**	0	-0*	-0*	0	-0**	0	-0.8	-0*	0	.0*	.0*	-0.6	0	-0**	0	.0*	-0.4	-0*	-0.8	-0**	-0.5	-0.7	-0.1	-0*	0
	G#m	-0.7		-0.1	0	-0.3	-.	.0**	.0*	0	0	-0.1	-0.6	-0.1	.0*	.0*	0	-0.4	1	0	.0**	0	0	.0**	0	0	-0.7	-0.1	-0.2		-0.4	-0*	-0.2	0	-0.1	0	-0.3	-0.3	.0**	-0.2	0	-.	-0.3	0	-0*	0	.0**	0	-0*
	AM	0	-0.2	0	0	0	-0*	.0**	.0*	.0**	.0**	.0*	0	-0*	0	0	.0**	0	0	1	.0**	.0**	0	.0**	.0**	0	-0.7	0	0	.0*	.0**	-0*	0	.0**	.0*	0	0	-0.9	0	-0.2	-0.8	0	-0.3	-0.2		0	.0**	0	-0.6
	Am	.0**	.0*	.0**	.0**	0	-0.2	.0**	.0**	.0**	.0**	.0**	.0**	-0*	.0**	.0**	.0**	0	.0**	.0**	1	.0**	.0**	.0**	.0**	0	0	.0**	.0*	.0**	.0**	-0.3	.0**	.0**	.0**	.0**	.0**	-0.6	.0**		-0.4	.0**	-0.5	0	.0**	.0**	.0**	.0**	.0*
	B♭M	.0**	.0**	.0**	.0**	0	0	.0**	.0**	.0**	.0**	.0**	.0**	-0.9	.0**	.0**	.0**	0	0	.0**	.0**	1	.0*	.1**	.0**	-0.5	0	.0**	-0.1	.0**	.0**	-.	.0**	.0**	.0**	.0**	.0**	-0.7	.0**	0	-0.8	.0**	-0.3	-.	.0**	.0**	.0*	0	.0**
	B♭m	.0**	.0**	.0**	.0**	0	0	.0**	.0**	.0**	.0*	.0**	.0**	-0.2	.0**	.0**	.0**	.0**	0	0	.0**	.0*	1	.0**	.0**	-0.2	-0.7	.0**	-0.9	.0**	0	-0.1	.0**	.0**	.0**	.0**	.0**	-0.8	0	0	0	.0**	0	0	0	.0**	.0**	0	0
	BM	.0**	.0**	.0**	.0**	.0**	-0*	.0**	.0**	.1**	.0**	.0**	.0**	-0.7	.0**	.0**	.0**	.0**	.0**	.0**	.0**	.1**	.0**	1	.0**	.0*	.0**	.0**	.0**	.0**	.0**	-0.2	.0**	.0**	.0**	.0**	.0**	.0**	.0**	.0**	.0**	.0**	.0**	.0**	.0**	.0**	.0**	.0**	.0**
	Bm	.0*	-0.6	0	.0**	0	-0**	.0**	.0**	.0**	.0**	.0**	.0**	-0.2	.0**	.0**	.0**	0	0	.0**	.0**	.0**	.0**	.0**	1	0	-0.2	0	0	.0**	.0*	-0.1	.0**	.0**	.0*	.0**	.0**	-0**	.0**	-0.1	-0*		.0*	-0.1	0	0	.0*	-0.3	0
No2	CM	-.	-0.6	-0.5	0	0	-0.5	-0.1	0	0	0	-0.2	0	-0.5	-0.6	-0.5	0	-0*	0	0	0	-0.5	-0.2	.0*	0	1	-0.3	-0.2	0	0	-0.2	-0**	-0.4	.0**	-0.3	0	-0.7	-0.1	-0.1	-0**	0	-.	-0.3	-0.1	-0*	-0.2	-0.1		-0.7
	Cm	-0.2	0	-0.4	0	-0*	-0**	0	-0.4	0	0	-0*		-0*	0	-0.5	-0.7	-0*	-0.7	-0.7	0	0	-0.7	.0**	-0.2	-0.3	1	-0.7	-0.9	0	-0.5	-0**	0	-0.6	-0.1	0	0	-0**	-0.7	-0.8	-.	-0.2	-0.6	-0**	0	-0.3	0	-0.4	-.
	DbM	.0**	-0.2	.0*	.0*	0	-0**	.0**	.0**	.0**	0	0	0	-0.7	-0.8	0	.0**	0	-0.1	0	.0**	.0**	.0**	.0**	0	-0.2	-0.7	1	0	.0**	0	-.	0	.0**	0	.0**	.0*	-0.4	0	0	-0**	0	-0.3	-0.4	.0**	.0**	0	0	-0.7
	Dbm	-0.1	-0.3	-0.9	.0**	-0.3	-0**	0	.0*	.0*	0	.0**	0	-0.1	0	-0.8	.0**	-0**	-0.2	0	.0*	-0.1	-0.9	.0**	0	0	-0.9	0	1	.0*	-0.7	-0.1		0	0	.0**	-0**	-0*	0	-0.9	-0.4	-0*	-.	0	-0.5	-0.5	0		-0.1
	DM	.0**	0	.0**	.0**	0	-0*	.0**	.0**	.0**	.0**	.0**	.0**	-0.3	0	.0**	0	0		.0*	.0**	.0**	.0**	.0**	.0**	0	0	.0**	.0*	1	.0**	-0.1	.0**	.0**	0	.0**	.0**	-0.1	.0**	0	-0*	.0*	-0.4	0	.0**	.0**	.0**	0
	Dm	0	-0.4	0	.0**	-0.5	-0*	.0**	.0**	.0**	.0*	.0**	0	-0**	0	.0*	.0**	-0.8	-0.4	.0**	.0**	.0**	0	.0**	.0*	-0.2	-0.5	0	-0.7	.0**	1	-0.2	.0**	.0*	0	.0**	.0**	-0**	.0*	-0.2	-0*	.0**	0	0	.0**	-0.1	.0**	-0.1	0
	E♭M	-.	-0**	-0*	-0.5	-0**	-0**	-0*	-0.6	-0.1	-0.6	-0.8	-.	-0**	-0**	-0**	-0.7	-0*	-0*	-0*	-0.3	-.	-0.1	-0.2	-0.1	-0**	-0**	-.	-0.1	-0.1	-0.2	1	-0.5	-0.4	-0*	-0.2	-0**	-0**	-0**	-0*	-0*	-0*	-0**	-0.1	-0**	-0.3	-0*	-0**	-0**
	E♭m	0	-0.1	-0.3	.0**		-0**	.0**	.0**	.0**	.0**	.0**	.0**	-0**	.0**	.0**	.0**	0	-0.2	0	.0**	.0**	.0**	.0**	.0**	-0.4	0	0		.0**	.0**	-0.5	1	.0**	.0**	.0**	0	-0**	.0**	-0.5	-0**	-0.3	0	-0.1	.0**	.0*	.0**	0	0
	EM	.0**	.0*	.0**	.0**	.0*	0	.0**	.0**	.0**	.0**	.0**	.0**	0	.0**	.0**	.0**	.0*	0	.0**	.0**	.0**	.0**	.0**	.0**	.0**	-0.6	.0**	0	.0**	.0*	-0.4	.0**	1	.0**	.0**	.0**	-0.1	.0**	0	0	.0**	.0*	0	.0*	.0**	.0**	.0**	.0**
	Em	.0*	0	0	.0**	0	-0.2	.0**	.0**	.0**	.0**	.0**	.0*	-0.8	.0**	.0**	.0**	.0*	-0.1	.0*	.0**	.0**	.0**	.0**	.0*	-0.3	-0.1	0	0	0	0	-0*	.0**	.0**	1	.0**	0	-0*	0	0	-0*	0	0	-0.1	.0**	.0**	.0**	-0.9	.0*
	FM	.0**	.0**	.0**	.0**	0	-0.6	.0**	.0**	.0**	.0**	.0**	.0**	0	.0**	.0**	.0**	-0.6	0	0	.0**	.0**	.0**	.0**	.0**	0	0	.0**	.0**	.0**	.0**	-0.2	.0**	.0**	.0**	1	.0**	-0.2	.0**	0	.0**	.0**	0	-0.3	.0**	.0**	.0**	.0*	.0**
	Fm	0	0	0	0	-.	-0**	.0**	0	.0**	.0**	0	0	-0**	-0.1	.0**	.0**	0	-0.3	0	.0**	.0**	.0**	.0**	.0**	-0.7	0	.0*	-0**	.0**	.0**	-0**	0	.0**	0	.0**	1	-0.8	0	-0.9	-0*	-0.8	-0.9	-0*	.0*	.0**	.0*	0	-0.2
	F#M	0	-0*	-0**	-0*	-0**	-0**	-0.3	0	0	-0**	-0.3	-0.4	-0**	-0.7	-0**	-0.4	-0**	-0.3	-0.9	-0.6	-0.7	-0.8	.0**	-0**	-0.1	-0**	-0.4	-0*	-0.1	-0**	-0**	-0**	-0.1	-0*	-0.2	-0.8	1	-0**	-0*	-0*	-0.2	-0**	-0*	-0*	-0.9	-0.5	-0*	-0.4
	F#m	0	-0.2	.0**	.0*	-0*	-0**	0	.0**	.0**	.0**	0	-0.2	-0*	0	.0**	.0**	0	.0**	0	.0**	.0**	0	.0**	.0**	-0.1	-0.7	0	0	.0**	.0*	-0**	.0**	.0**	0	.0**	0	-0**	1	-0.1	-0.3	-.	0	0	0	.0*	.0**		.0*
	GM	-0.2	-0.4	-0.7	0	-0.4	-0**	.0**	-0.6	.0*	-0.7	.0**	0	-0*	-0.2	.0*	.0**	.0*	-0.2	-0.2		0	0	.0**	-0.1	-0**	-0.8	0	-0.9	0	-0.2	-0*	-0.5	0	0	0	-0.9	-0*	-0.1	1	-0**	-0.8	-0**	-0*	-0.6	0	0	-0.6	-0*
	Gm	-0.4	-0**	-0.2	0	-0.5	-0**		0	-0.2	0	-0.4	-0.7	-0*	-0**	-0*	-0.8	-0.4	0	-0.8	-0.4	-0.8	0	.0**	-0*	0	-.	-0**	-0.4	-0*	-0*	-0*	-0**	0	-0*	.0**	-0*	-0*	-0.3	-0**	1	-.	-0.3	0	-0*	-0*	-0.1	-0.4	-0.7
	A♭M		-0.6	-0.8	.0*	-0.9	-0**	.0*	.0**	.0**	.0**	.0**	-0.4	-0**	0	-0.2	.0*	-0*	-.	0	.0**	.0**	.0**	.0**		-.	-0.2	0	-0*	.0*	.0**	-0*	-0.3	.0**	0	.0**	-0.8	-0.2	-.	-0.8	-.	1	-0*	-0.2	0	.0*	0	0	-0*
	G#m	0	-0**	-0*	0	-0*	-0**	-0.3	0	.0*	-0.4	0	-0.2	-0*		0	.0**	-0.8	-0.3	-0.3	-0.5	-0.3	0	.0**	.0*	-0.3	-0.6	-0.3	-.	-0.4	0	-0**	0	.0*	0	0	-0.9	-0**	0	-0**	-0.3	-0*	1	.0*	-.	-0.3	0	0	0
	AM	-0.7	-0*	-.	-0.1	-0.4	-0**	-0.8	0	.0*	-0.8	.0*	0	-0.9	-0.1	-0.4	0	-0**	0	-0.2	0	-.	0	.0**	-0.1	-0.1	-0**	-0.4	0	0	0	-0.1	-0.1	0	-0.1	-0.3	-0*	-0*	0	-0*	0	-0.2	.0*	1	-0*	0	-0.1	-0.7	-0.3
	Am	-0.4	0	0	0	0	-0.3	.0**	.0**	.0**	.0**	-0.4	0	-0.9	.0**	.0**	0	-0.5	-0*		.0**	.0**	0	.0**	0	-0*	0	.0**	-0.5	.0**	.0**	-0**	.0**	.0*	.0**	.0**	.0*	-0*	0	-0.6	-0*	0	-.	-0*	1	0	.0**	0	0
	B♭M	0	.0**	0	0	0	-0**	.0**	.0**	.0**	.0*	.0**	0	-0*	.0*	.0*	.0**	-0.7	0	0	.0**	.0**	.0**	.0**	0	-0.2	-0.3	.0**	-0.5	.0**	-0.1	-0.3	.0*	.0**	.0**	.0**	.0**	-0.9	.0*	0	-0*	.0*	-0.3	0	0	1	.0*	0	-0.1
	B♭m	0		.0*	0	-0.6	-0.4	.0**	.0**	.0**	.0**	0	0	-0.7	.0**	.0**	.0**	-0.1	.0**	.0**	.0**	.0*	.0**	.0**	.0*	-0.1	0	0	0	.0**	.0**	-0*	.0**	.0**	.0**	.0**	.0*	-0.5	.0**	0	-0.1	0	0	-0.1	.0**	.0*	1	.0**	-0.1
	BM	0	-0.1	0	0	-0.3	-0**	.0**	.0**	.0**	.0*	0	-0.3	-0.8	.0*	0	-0.3	-0*	0	0	.0**	0	0	.0**	-0.3		-0.4	0		0	-0.1	-0**	0	.0**	-0.9	.0*	0	-0*		-0.6	-0.4	0	0	-0.7	0	0	.0**	1	-0.4
	Bm	0	-0.7	-0.3	0	-0.6	-0**	0	.0*	.0**	0	.0**	-0.4	-0.1	0	.0**	0	0	-0*	-0.6	.0*	.0**	0	.0**	0	-0.7	-.	-0.7	-0.1		0	-0**	0	.0**	.0*	.0**	-0.2	-0.4	.0*	-0*	-0.7	-0*	0	-0.3	0	-0.1	-0.1	-0.4	1
